# Supplementary material for: Palladium-catalyzed decarboxylative C2-acylation of indoles with α-oxocarboxylic acids
Source: Royal Society of Chemistry journal article supplement (doi:10.1039/c3cc40709h), 2013-01-01

# Supporting Information

## Palladium-Catalyzed Decarboxylative C2-Acylation of Indoles with $\alpha$ -Oxocarboxylic Acids

Changduo Pan, Hongming Jin, Xu Liu, Yixiang Cheng and Chengjian Zhu\*

*E-mail: cjzhu@nju.edu.cn*

1. General experimental details.....S2
2. Experimental characterization data for products.....S3-10
3. Copies of product  $^1\text{H}$  NMR and  $^{13}\text{C}$  NMR.....S11-32

## Experimental

### 1. General experimental details

<sup>1</sup>H NMR and <sup>13</sup>C NMR spectra were measured on 300 MHz, 400 MHz or 600 MHz spectrometer, using CDCl<sub>3</sub> as the solvent with tetramethylsilane (TMS) as the internal standard at room temperature. Chemical shifts ( $\delta$ ) are given in ppm relative to TMS, the coupling constants *J* are given in Hz. HRMS were recorded on an Agilent 6210 TOF LC/MS equipped with electrospray ionization (ESI) probe operating in positive or negative ion mode.

### Starting Materials:

All the 2-pyrimidylindoles were prepared according to the literature.<sup>1</sup> All  $\alpha$ -oxocarboxylic acids except phenylglyoxylic acid **2a** were prepared from oxidation of corresponding methyl ketones with SeO<sub>2</sub> according to the reported procedure.<sup>2</sup>

**General procedure for palladium-catalyzed decarboxylative C2-acylation of indoles with  $\alpha$ -oxocarboxylic acids to provide 2-aryloindole:** Under N<sub>2</sub>, a sealed tube was charged with indole **1** (0.2 mmol),  $\alpha$ -oxocarboxylic acid **2** (0.3 mmol), Pd(OAc)<sub>2</sub> (4.48 mg, 10 mol %), Ag<sub>2</sub>O (92 mg, 0.4 mmol), K<sub>2</sub>S<sub>2</sub>O<sub>8</sub> (54 mg, 0.2 mmol), 1,4-dioxant/HOAc/DMSO (7.5/2/0.5) 2 mL. The reaction tube was kept stirring at 130 °C for 24 h or 36 h. After the completion of the reaction, as monitored by TLC, the solvent was evaporated under reduced pressure and the residue was purified by flash column chromatography on silica gel to give the product.

**The procedure of removal of 2-pyrimidyl director<sup>1</sup>:** Under N<sub>2</sub>, a mixture of **3** (0.18 mmol), EtONa (36.7, 0.54 mmol) and DMSO (3 mL) was stirred in a reaction tube at 100 °C for 24 h. The resulting mixture was then quenched with water. The mixture was extracted with ethyl acetate, and the combined organic layer was dried over sodium sulfate. The solvent was evaporated under reduced pressure and the residue was purified by flash column chromatography (petroleum ether/ethyl acetate) on silica gel to give the product.

---

<sup>1</sup> L. Ackermann and A. V. Lygin, *Org. Lett.*, 2011, **13**, 3332.

<sup>2</sup> K. Wadhwa, C.-X. Yang, P. R. West, K. C. Deming, S. R. Chemburkar and R. E. Reddy, *Synth. Commun.*, 2008, **38**, 4434.

## 2. Experimental characterization data for compounds **phenyl(1-(pyrimidin-2-yl)-1H-indol-2-yl)methanone (3aa)**

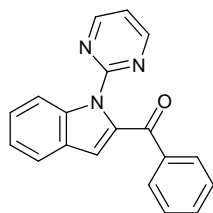

White solid, mp. 122-124 °C. <sup>1</sup>H NMR (CDCl<sub>3</sub>, 300 MHz): δ 8.63 (d, *J* = 4.8 Hz, 2H), 8.43 (d, *J* = 8.4 Hz, 1H), 7.99 (d, *J* = 7.1 Hz, 2H), 7.72 (d, *J* = 7.8 Hz, 2H), 7.58-7.53 (m, 1H), 7.49-7.43 (m, 3H), 7.34-7.27 (m, 1H), 7.15 (s, 1H), 7.07-7.03 (m, 1H). <sup>13</sup>C NMR (CDCl<sub>3</sub>, 150 MHz): δ 187.6, 158.0, 157.3, 138.3, 137.9, 137.2, 132.8, 129.6, 128.4, 128.0, 126.6, 122.9, 122.5, 117.3, 115.5, 114.2.

HRMS (ESI) *m/z* calcd for C<sub>21</sub>H<sub>16</sub>N<sub>3</sub>NaO<sub>3</sub> (M+Na)<sup>+</sup> 322.0956, found 322.0949.

## **(1-(pyrimidin-2-yl)-1H-indol-2-yl)(*p*-tolyl)methanone (3ab)**

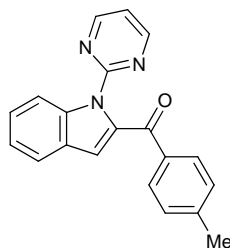

White solid, mp. 121-123 °C. <sup>1</sup>H NMR (CDCl<sub>3</sub>, 300 MHz): δ 8.64 (d, *J* = 4.8 Hz, 2H), 8.42 (d, *J* = 8.4 Hz, 1H), 7.91 (d, *J* = 8.1 Hz, 2H), 7.71 (d, *J* = 7.8 Hz, 1H), 7.48-7.45 (m, 1H), 7.43-7.25 (m, 3H), 7.12 (s, 1H), 7.08-7.05 (m, 1H), 2.43 (s, 3H). <sup>13</sup>C NMR (CDCl<sub>3</sub>, 150 MHz): δ 187.4, 158.0, 157.3, 143.7, 138.3, 137.3, 135.3, 129.8, 129.1, 128.0, 126.4, 122.8, 122.5, 117.5, 115.2, 114.2, 21.8.

HRMS (ESI) *m/z* calcd for C<sub>20</sub>H<sub>15</sub>N<sub>3</sub>NaO (M+Na)<sup>+</sup> 336.1113, found 336.1110.

## **(4-methoxyphenyl)(1-(pyrimidin-2-yl)-1H-indol-2-yl)methanone (3ac)**

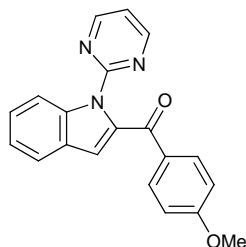

White solid, mp. 38-40 °C. <sup>1</sup>H NMR (CDCl<sub>3</sub>, 300 MHz): δ 8.64 (d, *J* = 4.8 Hz, 2H), 8.42 (d, *J* = 8.4 Hz, 1H), 8.0 (d, *J* = 8.8 Hz, 2H), 7.71 (d, *J* = 7.8 Hz, 1H), 7.47-7.42 (m, 1H), 7.32-7.27 (m, 1H), 7.09-7.05 (m, 2H), 6.97-6.93 (m, 2H), 3.87 (s, 3H). <sup>13</sup>C NMR (CDCl<sub>3</sub>, 150 MHz): δ 186.5, 163.4, 158.0, 157.4, 138.1, 137.3, 131.9, 130.8, 128.1, 126.3, 122.8, 122.4, 117.4, 114.7, 114.2, 113.6, 55.5.

HRMS (ESI) *m/z* calcd for C<sub>20</sub>H<sub>15</sub>N<sub>3</sub>NaO<sub>2</sub> (M+Na)<sup>+</sup> 352.1062, found 352.1058.

**(3-methoxyphenyl)(1-(pyrimidin-2-yl)-1H-indol-2-yl)methanone (3ad)**

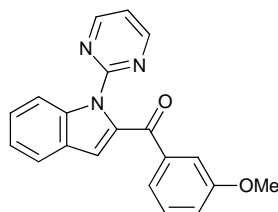

Semi-solid.  $^1\text{H}$  NMR ( $\text{CDCl}_3$ , 300 MHz):  $\delta$  8.65 (d,  $J = 4.6$  Hz, 2H), 8.41 (d,  $J = 8.4$  Hz, 1H), 7.72 (d,  $J = 7.8$  Hz, 1H), 7.57-7.54 (m, 2H), 7.48-7.43 (m, 1H), 7.37-7.27 (m, 2H), 7.16-7.06 (m, 3H), 3.85 (s, 3H).  $^{13}\text{C}$  NMR ( $\text{CDCl}_3$ , 150 MHz):  $\delta$  187.3, 159.6, 158.0, 157.3, 139.2, 138.3, 137.1, 129.4, 127.9, 126.6, 122.8, 122.6, 119.6, 117.5, 115.6, 114.2, 113.4, 55.5.

HRMS (ESI)  $m/z$  calcd for  $\text{C}_{20}\text{H}_{15}\text{N}_3\text{NaO}_2$  ( $\text{M}+\text{Na}$ ) $^+$  352.1062, found 352.1057.

**naphthalen-1-yl(1-(pyrimidin-2-yl)-1H-indol-2-yl)methanone (3ae)**

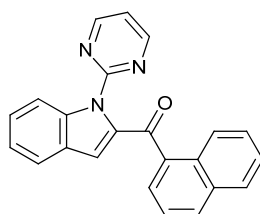

White solid, mp. 136-138  $^\circ\text{C}$ .  $^1\text{H}$  NMR ( $\text{CDCl}_3$ , 300 MHz):  $\delta$  8.74 (d,  $J = 8.4$  Hz, 1H), 8.53 (d,  $J = 4.8$  Hz, 2H), 8.40 (d,  $J = 8.4$  Hz, 1H), 7.95-7.87 (m, 2H), 7.79-7.72 (m, 2H), 7.64-7.50 (m, 2H), 7.48-7.27 (m, 3H), 7.17 (s, 1H), 6.95-6.92 (m, 1H).  $^{13}\text{C}$  NMR ( $\text{CDCl}_3$ , 150 MHz):  $\delta$  188.9, 157.9, 157.4, 138.9, 138.5, 136.0, 133.7, 132.3, 131.1, 129.1, 128.2, 127.9, 127.6, 126.8, 126.4, 126.1, 124.2, 122.9, 122.7, 117.3, 116.3, 114.2.

HRMS (ESI)  $m/z$  calcd for  $\text{C}_{23}\text{H}_{15}\text{N}_3\text{NaO}$  ( $\text{M}+\text{Na}$ ) $^+$  372.1113, found 372.1114.

**naphthalen-2-yl(1-(pyrimidin-2-yl)-1H-indol-2-yl)methanone (3af)**

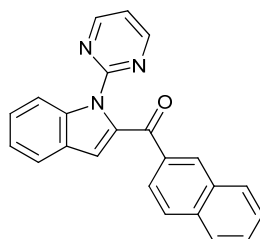

White solid, mp. 131-133  $^\circ\text{C}$ .  $^1\text{H}$  NMR ( $\text{CDCl}_3$ , 300 MHz):  $\delta$  8.62 (d,  $J = 4.8$  Hz, 2H), 8.49-8.45 (m, 2H), 8.11-8.07 (m, 1H), 7.93-7.88 (m, 3H), 7.75 (d,  $J = 8.4$  Hz, 1H), 7.63-7.46 (m, 3H), 7.36-7.30 (m, 1H), 7.19 (s, 1H), 7.05-7.01 (m, 1H).  $^{13}\text{C}$  NMR ( $\text{CDCl}_3$ , 150 MHz):  $\delta$  187.7, 158.0, 157.3, 138.3, 137.3, 135.5, 135.4, 132.4, 131.5,

129.6, 128.4, 128.1, 127.8, 126.7, 126.5, 125.1, 122.9, 122.5, 117.4, 115.4, 114.4.  
HRMS (ESI)  $m/z$  calcd for  $C_{23}H_{15}N_3NaO$  ( $M+Na$ )<sup>+</sup> 372.1113, found 372.1114.

**(4-chlorophenyl)(1-(pyrimidin-2-yl)-1H-indol-2-yl)methanone (3ag)**

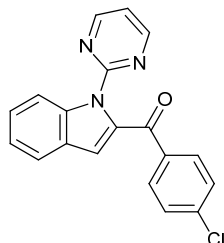

White solid, mp. 85-87 °C. <sup>1</sup>H NMR (CDCl<sub>3</sub>, 300 MHz): δ 8.63 (d,  $J$  = 4.8 Hz, 2H), 8.44 (d,  $J$  = 8.4 Hz, 1H), 7.92 (d,  $J$  = 8.4 Hz, 2H), 7.72 (d,  $J$  = 7.8 Hz, 1H), 7.49-7.41 (m, 3H), 7.34-7.28 (m, 1H), 7.13 (s, 1H), 7.08-7.05 (m, 1H). <sup>13</sup>C NMR (CDCl<sub>3</sub>, 150 MHz): δ 186.4, 158.0, 157.2, 139.1, 138.3, 136.7, 136.4, 130.9, 128.7, 127.9, 126.7, 123.0, 122.6, 117.5, 115.4, 114.4.

HRMS (ESI)  $m/z$  calcd for  $C_{19}H_{12}ClN_3NaO$  ( $M+Na$ )<sup>+</sup> 356.0567, found 356.0564.

**(4-bromophenyl)(1-(pyrimidin-2-yl)-1H-indol-2-yl)methanone (3ah)**

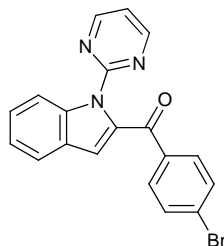

White solid, mp. 37-39 °C. <sup>1</sup>H NMR (CDCl<sub>3</sub>, 300 MHz): δ 8.63 (d,  $J$  = 4.8 Hz, 2H), 8.44 (d,  $J$  = 8.4 Hz, 1H), 7.84 (d,  $J$  = 8.4 Hz, 2H), 7.72 (d,  $J$  = 7.8 Hz, 1H), 7.59 (d,  $J$  = 7.8 Hz, 2H), 7.50-7.44 (m, 1H), 7.35-7.28 (m, 1H), 7.12 (s, 1H), 7.09-7.05 (m, 1H). <sup>13</sup>C NMR (CDCl<sub>3</sub>, 150 MHz): δ 186.6, 158.0, 157.2, 138.3, 136.8, 136.7, 131.7, 131.0, 127.9, 127.8, 126.8, 123.0, 122.6, 117.5, 115.5, 114.4.

HRMS (ESI)  $m/z$  calcd for  $C_{19}H_{12}BrN_3NaO$  ( $M+Na$ )<sup>+</sup> 400.0061, found 400.0055.

**(1-(pyrimidin-2-yl)-1H-indol-2-yl)(4-(trifluoromethyl)phenyl)methanone (3ai)**

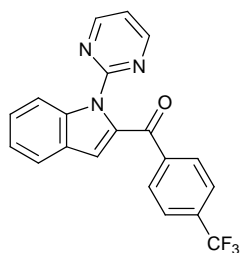

White solid, mp. 110-112 °C. <sup>1</sup>H NMR (CDCl<sub>3</sub>, 300 MHz): δ 8.64 (d,  $J$  = 4.8 Hz, 2H),

8.44 (d,  $J = 8.1$  Hz, 1H), 8.07 (d,  $J = 8.1$  Hz, 2H), 7.74-7.69 (m, 3H), 7.51-7.46 (m, 1H), 7.35-7.30 (m, 1H), 7.16 (s, 1H), 7.10 (t,  $J = 4.8$  Hz, 1H).  $^{13}\text{C}$  NMR ( $\text{CDCl}_3$ , 100 MHz):  $\delta$  186.3, 158.0, 157.2, 141.0, 138.4, 136.6, 133.9 (q,  $J_{\text{C-F}} = 32.5$  Hz), 129.6, 128.0, 126.9, 125.4 (q,  $J_{\text{C-F}} = 3.7$  Hz), 123.4 (q,  $J_{\text{C-F}} = 271.1$  Hz), 123.1, 122.6, 117.5, 115.8, 114.5.

HRMS (ESI)  $m/z$  calcd for  $\text{C}_{20}\text{H}_{13}\text{F}_3\text{N}_3\text{O}$  ( $\text{M}+\text{H}$ ) $^+$  368.1011, found 368.1015.

**(1-(pyrimidin-2-yl)-1H-indol-2-yl)(thiophen-2-yl)methanone (3aj)**

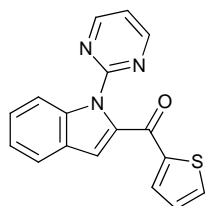

White solid, mp. 136-138 °C.  $^1\text{H}$  NMR ( $\text{CDCl}_3$ , 300 MHz):  $\delta$  8.70 (d,  $J = 4.8$  Hz, 2H), 8.38 (d,  $J = 8.4$  Hz, 1H), 7.84-7.82 (m, 2H), 7.74-7.69 (m, 1H), 7.48-7.42 (m, 1H), 7.33-7.27 (m, 2H), 7.17-7.10 (m, 2H).  $^{13}\text{C}$  NMR ( $\text{CDCl}_3$ , 150 MHz):  $\delta$  179.4, 158.1, 157.3, 144.3, 138.5, 136.6, 134.0, 133.9, 128.0, 127.9, 126.6, 122.9, 122.6, 117.6, 115.2, 114.1.

HRMS (ESI)  $m/z$  calcd for  $\text{C}_{17}\text{H}_{11}\text{N}_3\text{NaOS}$  ( $\text{M}+\text{Na}$ ) $^+$  328.0521, found 328.0518.

**furan-2-yl(1-(pyrimidin-2-yl)-1H-indol-2-yl)methanone (3ak)**

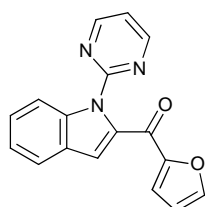

White solid, mp. 122-124 °C.  $^1\text{H}$  NMR ( $\text{CDCl}_3$ , 300 MHz):  $\delta$  8.69 (d,  $J = 4.8$  Hz, 2H), 8.36 (d,  $J = 8.4$  Hz, 1H), 7.3 (d,  $J = 7.8$  Hz, 1H), 7.63 (s, 1H), 7.45 (t,  $J = 7.8$  Hz, 1H), 7.37 (s, 1H), 7.30-7.28 (m, 2H), 7.11 (t,  $J = 4.8$  Hz, 1H), 6.55 (dd,  $J = 3.3, 1.5$  Hz, 1H).  $^{13}\text{C}$  NMR ( $\text{CDCl}_3$ , 150 MHz):  $\delta$  174.3, 158.1, 157.4, 152.6, 147.0, 135.6, 136.1, 127.9, 126.7, 122.8, 122.6, 119.4, 117.6, 115.3, 114.1, 112.3.

HRMS (ESI)  $m/z$  calcd for  $\text{C}_{17}\text{H}_{11}\text{N}_3\text{NaO}_2$  ( $\text{M}+\text{Na}$ ) $^+$  312.0749, found 312.0722.

**(7-methyl-1-(pyrimidin-2-yl)-1H-indol-2-yl)(phenyl)methanone (3ba)**

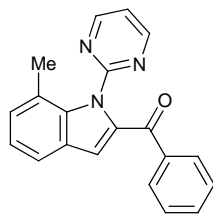

Yellowish solid, 35-37 °C.  $^1\text{H}$  NMR ( $\text{CDCl}_3$ , 300 MHz):  $\delta$  8.88 (d,  $J = 4.8$  Hz, 2H), 7.95 (d,  $J = 7.0$  Hz, 2H), 7.63-7.51 (m, 2H), 7.49-7.46 (m, 2H), 7.43-7.40 (m, 1H), 7.22 (s, 1H), 7.16-7.14 (m, 2H), 1.99 (s, 3H).  $^{13}\text{C}$  NMR ( $\text{CDCl}_3$ , 150 MHz):  $\delta$  187.1, 159.8, 158.2, 138.4, 138.2, 136.0, 132.5, 129.7, 129.3, 128.3, 127.3, 122.5, 121.9, 121.2, 120.3, 116.6, 19.4.

HRMS (ESI)  $m/z$  calcd for  $\text{C}_{20}\text{H}_{15}\text{N}_3\text{NaO}$  ( $\text{M}+\text{Na}$ ) $^+$  336.1113, found 336.1109.

**(4-methyl-1-(pyrimidin-2-yl)-1H-indol-2-yl)(phenyl)methanone (3ca)**

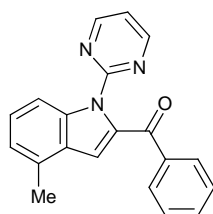

White solid, mp. 135-137 °C.  $^1\text{H}$  NMR ( $\text{CDCl}_3$ , 300 MHz):  $\delta$  8.64 (d,  $J = 4.8$  Hz, 2H), 8.22 (d,  $J = 8.4$  Hz, 1H), 7.99 (d,  $J = 7.1$  Hz, 2H), 7.55 (d,  $J = 7.2$  Hz, 1H), 7.48-7.43 (m, 2H), 7.39-7.34 (m, 1H), 7.19 (s, 1H), 7.09-7.04 (m, 2H), 2.59 (s, 3H).  $^{13}\text{C}$  NMR ( $\text{CDCl}_3$ , 100 MHz):  $\delta$  187.6, 158.0, 157.4, 138.3, 138.2, 136.8, 132.6, 132.2, 129.5, 128.3, 127.9, 126.7, 123.7, 117.4, 114.0, 111.7, 18.6.

HRMS (ESI)  $m/z$  calcd for  $\text{C}_{20}\text{H}_{15}\text{N}_3\text{NaO}$  ( $\text{M}+\text{Na}$ ) $^+$  336.1113, found 336.1110.

**(5-methoxy-1-(pyrimidin-2-yl)-1H-indol-2-yl)(phenyl)methanone (3da)**

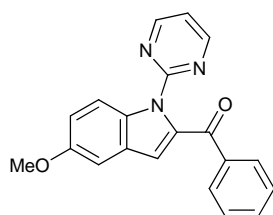

White solid, mp. 134-135 °C.  $^1\text{H}$  NMR ( $\text{CDCl}_3$ , 300 MHz):  $\delta$  8.59 (d,  $J = 4.8$  Hz, 2H), 8.35 (d,  $J = 9.0$  Hz, 1H), 7.96 (d,  $J = 7.1$  Hz, 2H), 7.56-7.51 (m, 1H), 7.46-7.40 (m, 2H), 7.14-7.06 (m, 3H), 7.03-7.00 (m, 1H), 3.89 (s, 3H).  $^{13}\text{C}$  NMR ( $\text{CDCl}_3$ , 150 MHz):  $\delta$  187.7, 157.9, 157.2, 155.9, 138.1, 137.6, 133.2, 132.7, 129.5, 128.7, 128.3, 117.2, 116.5, 115.4, 115.0, 103.4, 55.7.

HRMS (ESI)  $m/z$  calcd for  $\text{C}_{20}\text{H}_{15}\text{N}_3\text{NaO}_2$  ( $\text{M}+\text{Na}$ ) $^+$  352.1062, found 352.1060.

**(3-methyl-1-(pyrimidin-2-yl)-1H-indol-2-yl)(phenyl)methanone (3ea)**

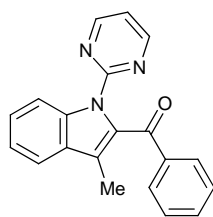

White solid, mp. 153-155 °C.  $^1\text{H}$  NMR ( $\text{CDCl}_3$ , 300 MHz):  $\delta$  8.65 (d,  $J = 8.4$  Hz, 1H), 8.46 (d,  $J = 4.8$  Hz, 2H), 7.80 (d,  $J = 7.2$  Hz, 2H), 7.70 (d,  $J = 7.8$  Hz, 1H), 7.51-7.41 (m, 2H), 7.38-7.31 (m, 3H), 6.87-6.84 (m, 1H), 2.39 (s, 3H).  $^{13}\text{C}$  NMR ( $\text{CDCl}_3$ , 150 MHz):  $\delta$  189.5, 157.6, 157.1, 139.2, 136.4, 133.2, 132.3, 130.3, 128.6, 128.5, 128.4, 126.2, 122.6, 120.2, 116.2, 115.2, 9.4.

HRMS (ESI)  $m/z$  calcd for  $\text{C}_{20}\text{H}_{15}\text{N}_3\text{NaO}$  ( $\text{M}+\text{Na}$ ) $^+$  336.1113, found 336.1111.

**(6-fluoro-1-(pyrimidin-2-yl)-1H-indol-2-yl)(phenyl)methanone (3fa)**

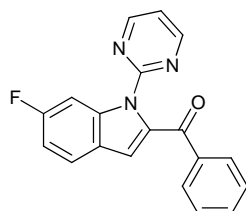

White solid, mp. 125-127 °C.  $^1\text{H}$  NMR ( $\text{CDCl}_3$ , 300 MHz):  $\delta$  8.64 (d,  $J = 4.8$  Hz, 2H), 8.15 (d,  $J = 7.5$  Hz, 1H), 7.98 (d,  $J = 7.1$  Hz, 2H), 7.66-7.54 (m, 2H), 7.48-7.43 (m, 2H), 7.11-7.03 (m, 3H).  $^{13}\text{C}$  NMR ( $\text{CDCl}_3$ , 150 MHz):  $\delta$  187.1, 162.3 (d,  $J_{\text{C-F}} = 241.6$  Hz), 158.1, 157.1, 138.7 (d,  $J_{\text{C-F}} = 13.2$  Hz), 137.8, 137.7 (d,  $J_{\text{C-F}} = 3.3$  Hz), 132.8, 129.6, 128.4, 124.4, 123.5 (d,  $J_{\text{C-F}} = 10.2$  Hz), 117.6, 115.4, 111.8 (d,  $J_{\text{C-F}} = 25.0$  Hz), 101.3 (d,  $J_{\text{C-F}} = 28.4$  Hz).

HRMS (ESI)  $m/z$  calcd for  $\text{C}_{19}\text{H}_{12}\text{FN}_3\text{NaO}$  ( $\text{M}+\text{Na}$ ) $^+$  340.0862, found 340.0861.

**(6-chloro-1-(pyrimidin-2-yl)-1H-indol-2-yl)(phenyl)methanone (3ga)**

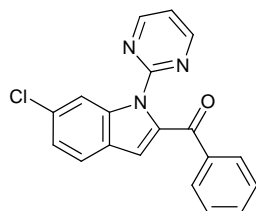

Semi-solid.  $^1\text{H}$  NMR ( $\text{CDCl}_3$ , 300 MHz):  $\delta$  8.65 (d,  $J = 4.8$  Hz, 2H), 8.48 (d,  $J = 1.8$  Hz, 1H), 7.97-7.95 (m, 2H), 7.63-7.54 (m, 2H), 7.48-7.43 (m, 2H), 7.29-7.26 (m, 1H), 7.11-7.07 (m, 2H).  $^{13}\text{C}$  NMR ( $\text{CDCl}_3$ , 100 MHz):  $\delta$  187.2, 158.1, 157.0, 138.5, 137.8, 132.9, 132.4, 130.2, 129.5, 128.3, 126.5, 123.7, 123.2, 117.7, 114.8, 114.6.

HRMS (ESI)  $m/z$  calcd for  $\text{C}_{19}\text{H}_{12}\text{ClN}_3\text{NaO}$  ( $\text{M}+\text{Na}$ ) $^+$  356.0567, found 356.0565.



**(5-bromo-1-(pyrimidin-2-yl)-1H-indol-2-yl)(phenyl)methanone (3ha)**

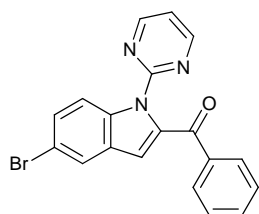

White solid, mp. 120-122 °C. <sup>1</sup>H NMR (CDCl<sub>3</sub>, 300 MHz): δ 8.62 (d, *J* = 4.8 Hz, 2H), 8.33 (d, *J* = 9.0 Hz, 1H), 7.96-7.94 (m, 2H), 7.83 (d, *J* = 1.8 Hz, 1H), 7.59-7.42 (m, 4H), 7.09-7.03 (m, 2H). <sup>13</sup>C NMR (CDCl<sub>3</sub>, 100 MHz): δ 187.5, 158.0, 157.0, 138.1, 137.7, 136.7, 132.9, 129.8, 129.5, 129.2, 128.4, 124.8, 117.6, 116.1, 115.9, 113.6. HRMS (ESI) *m/z* calcd for C<sub>19</sub>H<sub>12</sub>BrN<sub>3</sub>NaO (M+Na)<sup>+</sup> 400.0061, found 400.0055.

**methyl 2-benzoyl-1-(pyrimidin-2-yl)-1H-indole-5-carboxylate (3ia)**

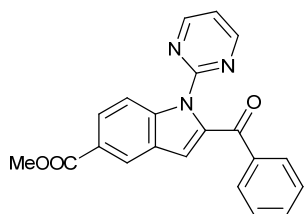

White solid, mp. 111-113 °C. <sup>1</sup>H NMR (CDCl<sub>3</sub>, 300 MHz): δ 8.66 (d, *J* = 4.8 Hz, 2H), 8.46-8.41 (m, 2H), 8.13 (d, *J* = 8.9 Hz, 1H), 7.98 (d, *J* = 7.1 Hz, 2H), 7.61-7.55 (m, 1H), 7.49-7.44 (m, 2H), 7.18 (s, 1H), 7.12 (t, *J* = 4.8 Hz, 1H), 3.97 (s, 3H). <sup>13</sup>C NMR (CDCl<sub>3</sub>, 150 MHz): δ 187.3, 167.4, 158.2, 156.9, 140.5, 138.3, 137.6, 133.0, 129.6, 128.5, 127.7, 127.4, 125.2, 124.8, 118.0, 115.4, 114.0, 52.2. HRMS (ESI) *m/z* calcd for C<sub>21</sub>H<sub>15</sub>N<sub>3</sub>NaO<sub>3</sub> (M+Na)<sup>+</sup> 380.1011, found 380.1018.

**(1H-indol-2-yl)(phenyl)methanone (3aa')<sup>3</sup>**

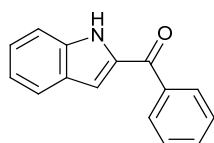

<sup>1</sup>H NMR (CDCl<sub>3</sub>, 300 MHz): δ 9.61 (s, 1H), 8.03 (d, *J* = 8.1 Hz, 2H), 7.74 (d, *J* = 8.1 Hz, 1H), 7.67-7.50 (m, 4H), 7.42-7.37 (m, 1H), 7.21-7.16 (m, 2H). <sup>13</sup>C NMR (CDCl<sub>3</sub>, 150 MHz): δ 187.3, 138.0, 137.6, 134.3, 132.4, 129.3, 128.5, 127.7, 126.6, 123.3, 121.1, 112.9, 112.3.

<sup>3</sup> M. Arthuis, R. Pontikis and J.-C. Florent, *Org. Lett.*, 2009, **11**, 4608.

**(7-methyl-1H-indol-2-yl)(phenyl)methanone (3ba')<sup>4</sup>**

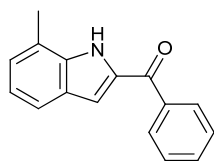

<sup>1</sup>H NMR (CDCl<sub>3</sub>, 300 MHz): δ 9.49 (s, 1H), 8.03 (d, *J* = 6.9 Hz, 2H), 7.64-7.52 (m, 4H), 7.20-7.18 (m, 2H), 7.13-7.08 (m, 1H), 2.58 (s, 3H). <sup>13</sup>C NMR (CDCl<sub>3</sub>, 150 MHz): δ 187.4, 138.1, 137.5, 134.2, 132.4, 129.3, 128.5, 127.3, 126.7, 121.7, 121.3, 120.8, 113.6, 16.8.

**(4-chlorophenyl)(1H-indol-2-yl)methanone (3ag')<sup>3</sup>**

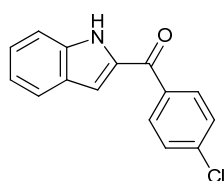

<sup>1</sup>H NMR (CDCl<sub>3</sub>, 300 MHz): δ 9.63 (s, 1H), 7.97 (d, *J* = 8.4 Hz, 2H), 7.74 (d, *J* = 8.1 Hz, 1H), 7.55-7.49 (m, 3H), 7.43-7.38 (m, 1H), 7.22-7.16 (m, 2H). <sup>13</sup>C NMR (CDCl<sub>3</sub>, 150 MHz): δ 185.9, 138.8, 137.7, 136.3, 134.0, 130.6, 128.8, 127.7, 126.8, 123.3, 121.2, 112.8, 112.2.

---

<sup>4</sup> Q.-Q. Yang, C. Xiao, L.-Q. Lu, J. An, F. Tan, B.-J. Li and W.-J. Xiao, *Angew. Chem. Int. Ed.*, 2012, **51**, 9137.



S12

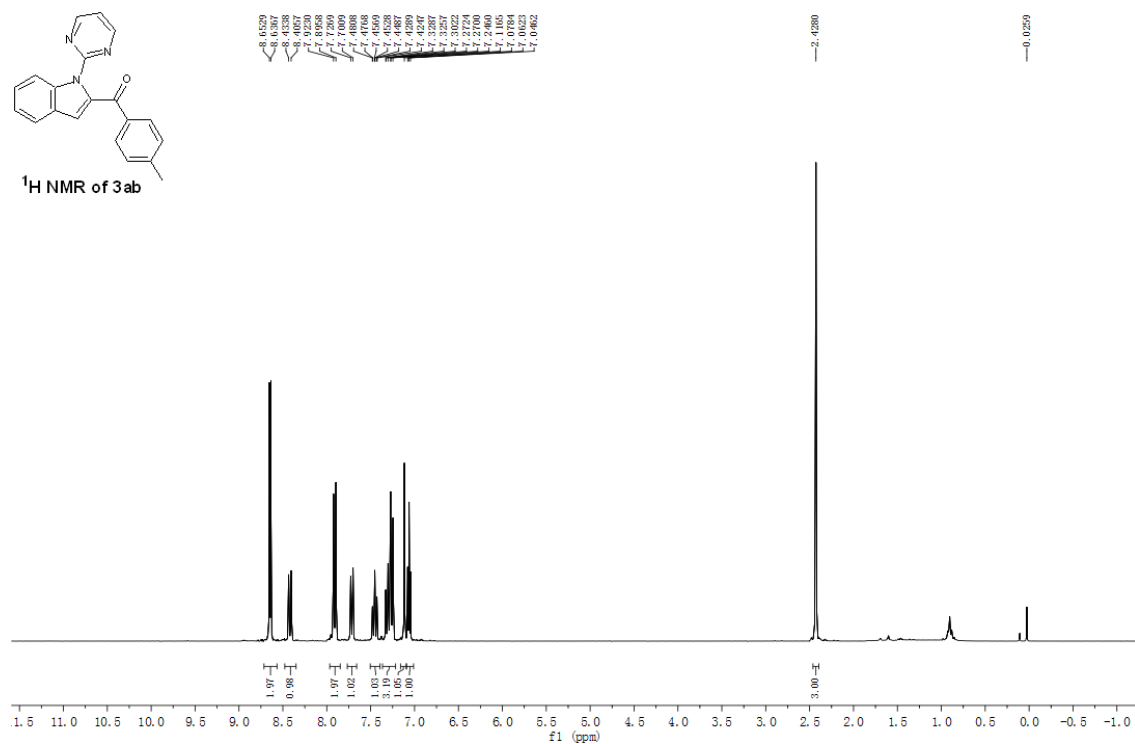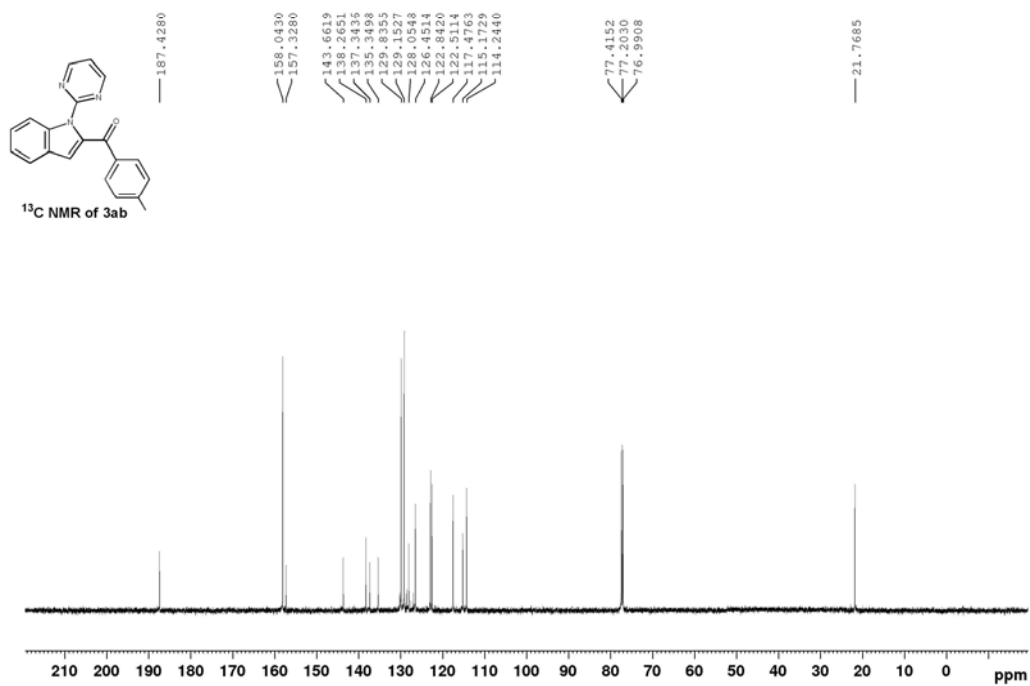

S13

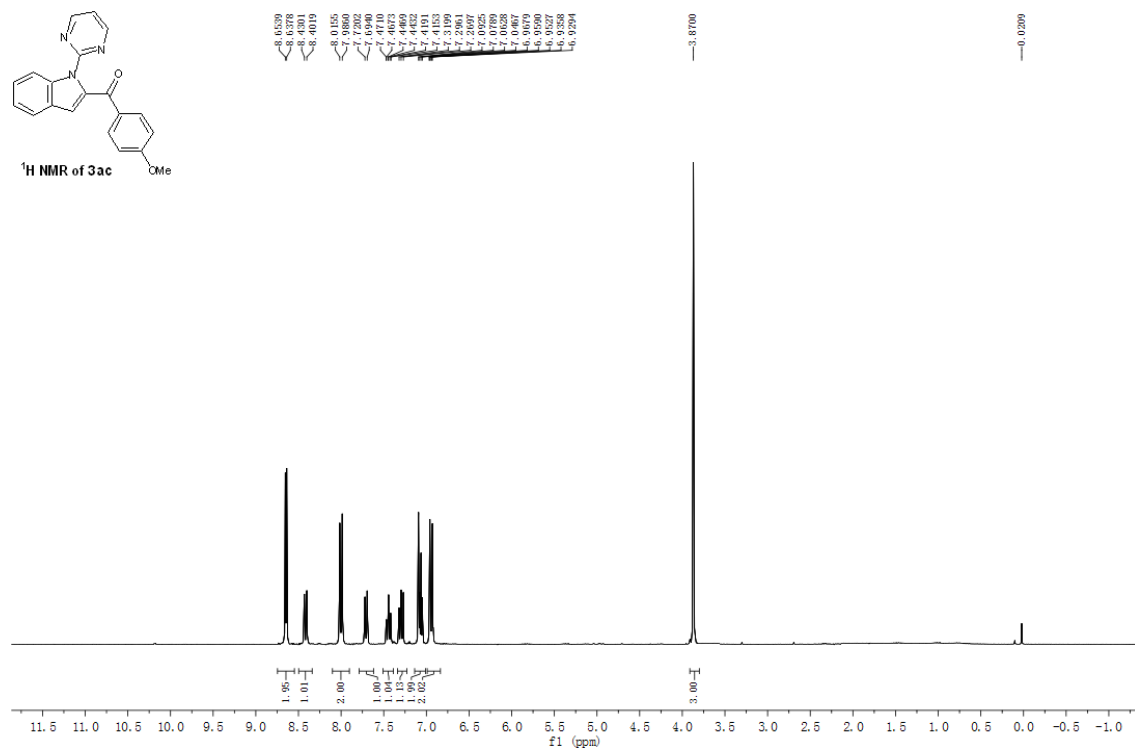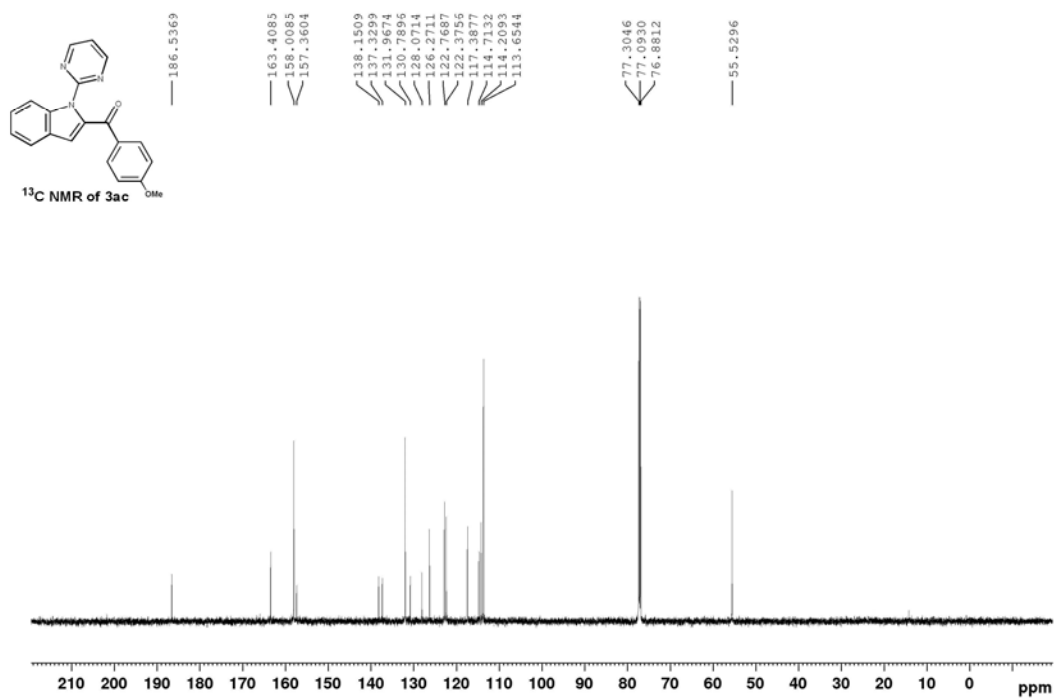

S14

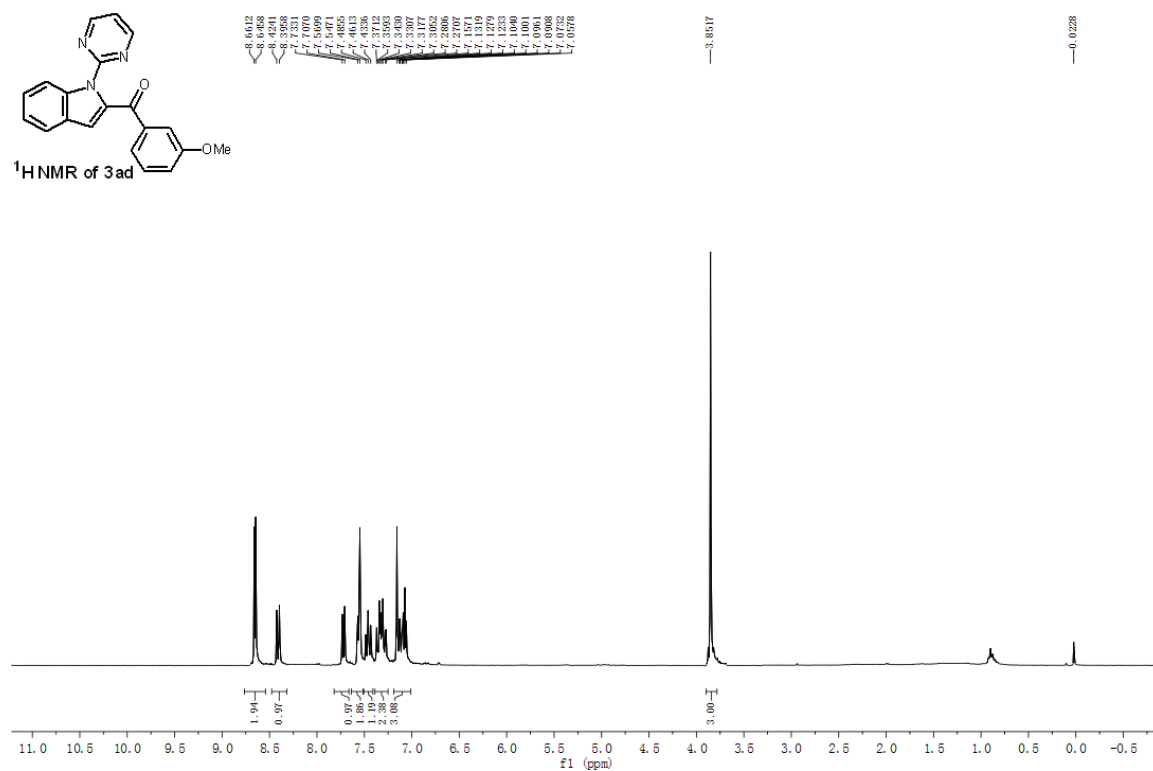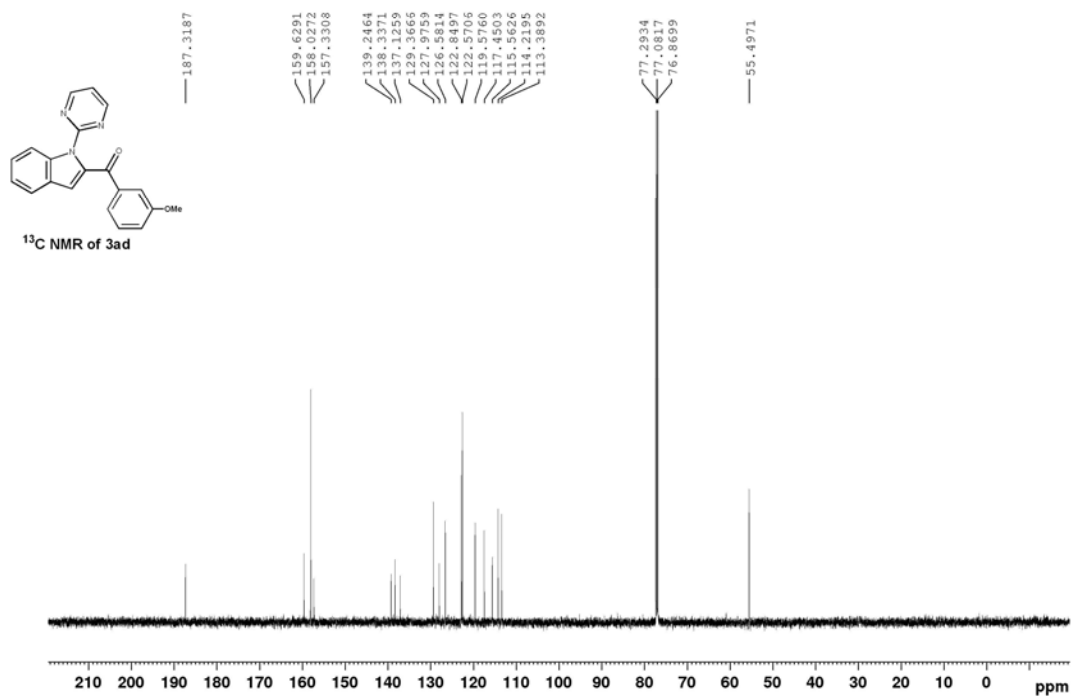

S15

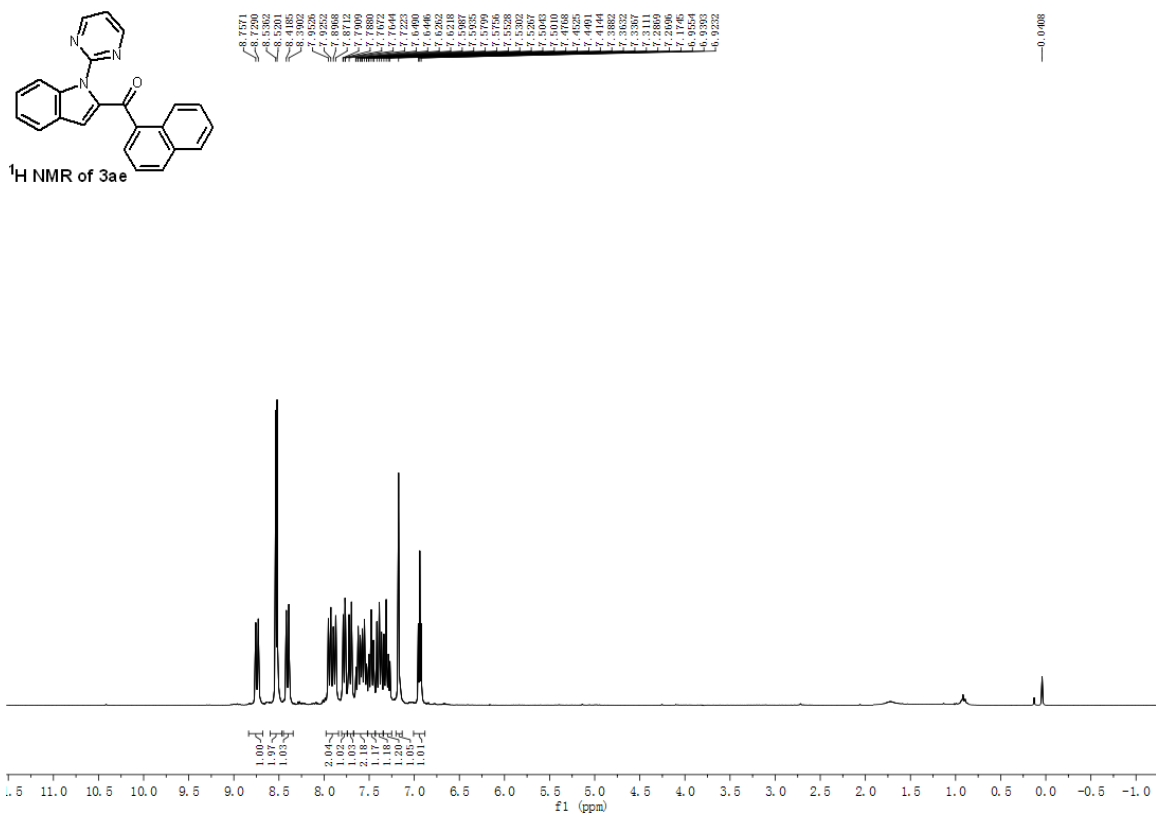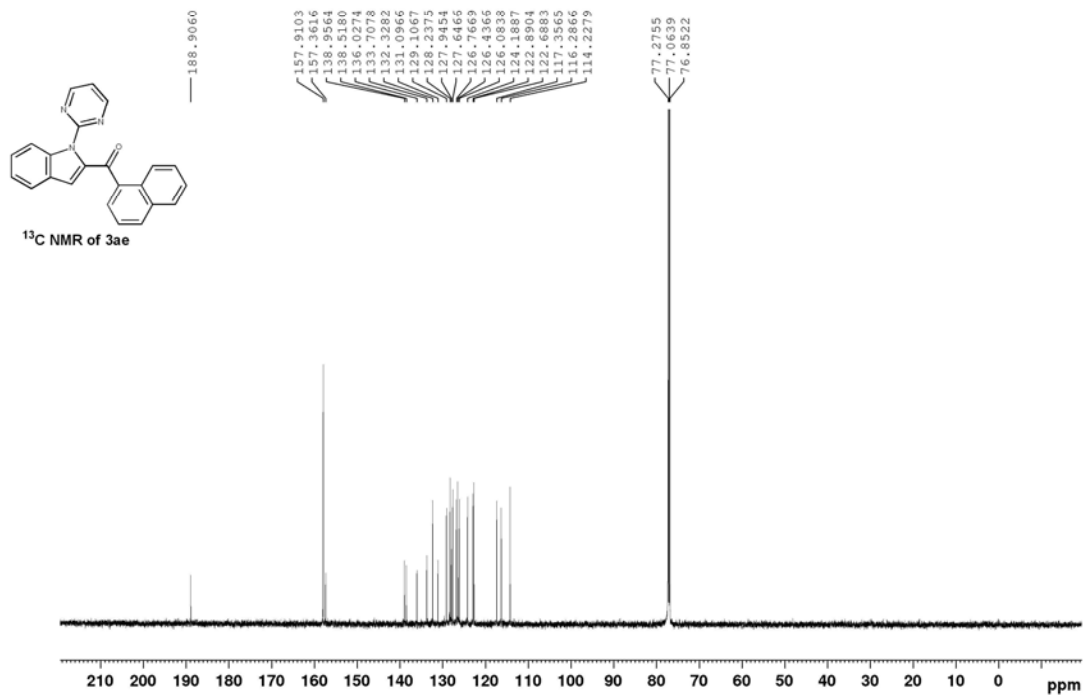

S16

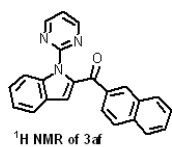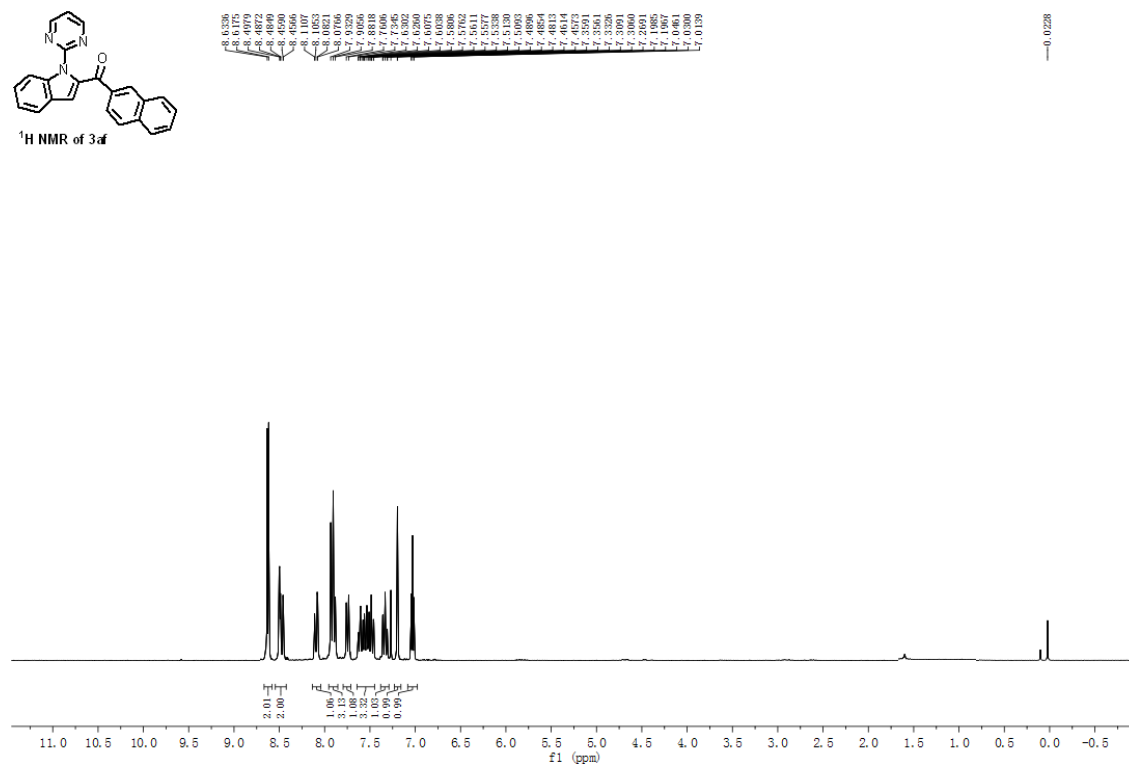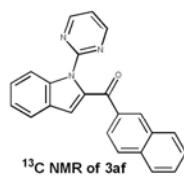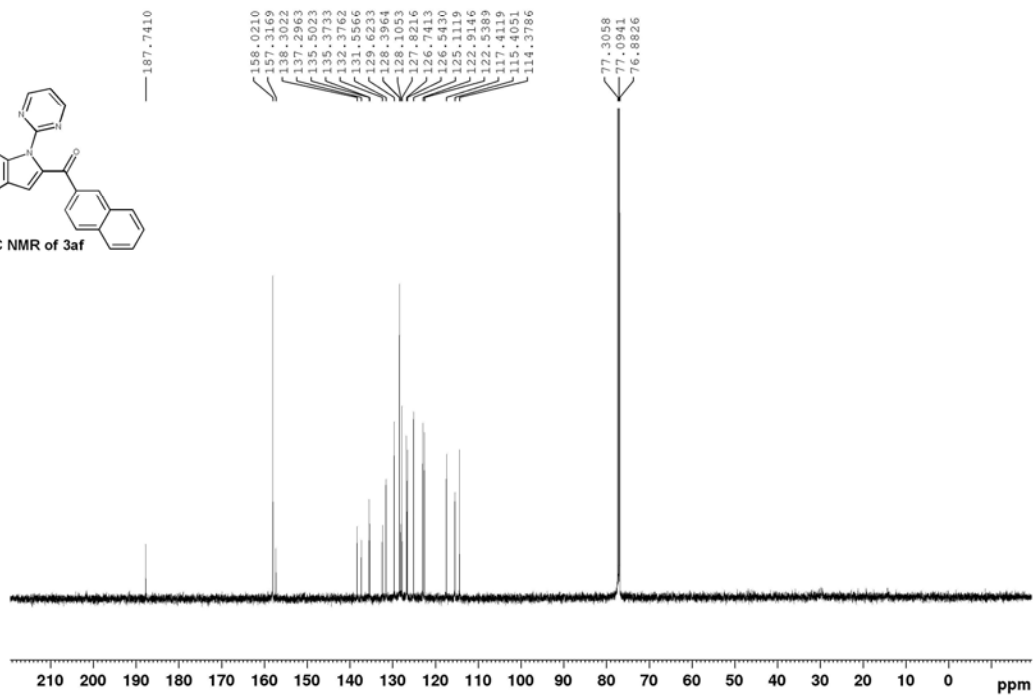





S18

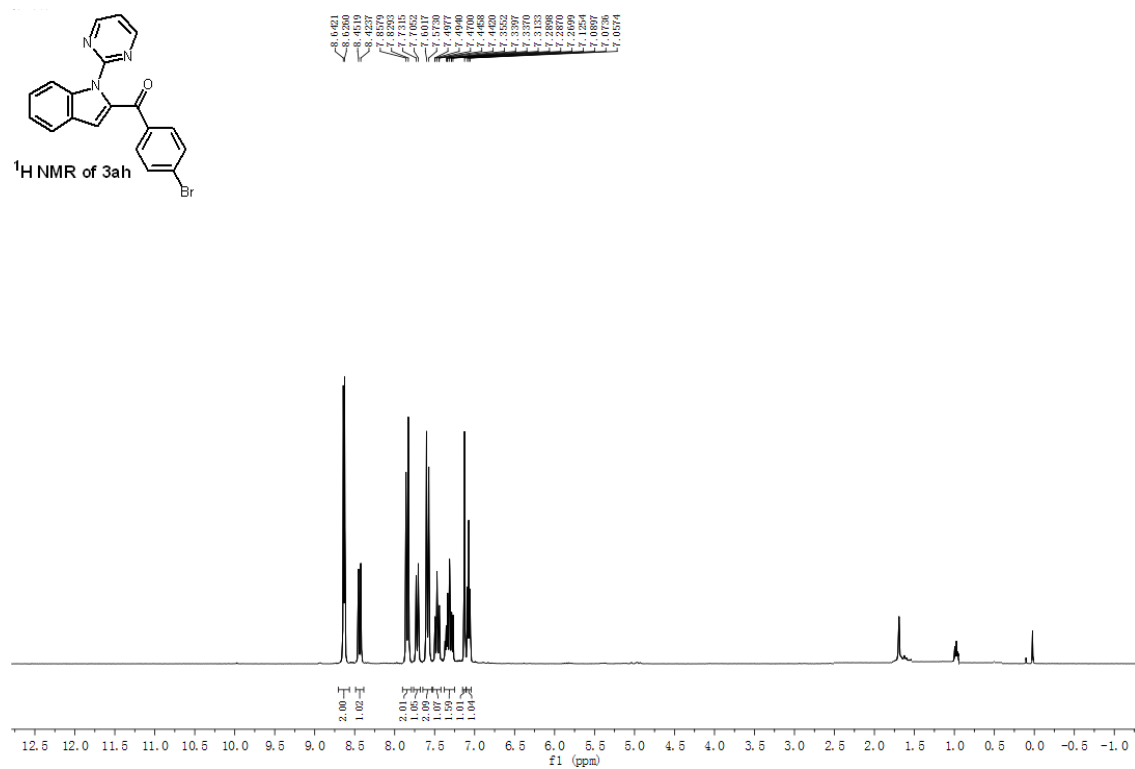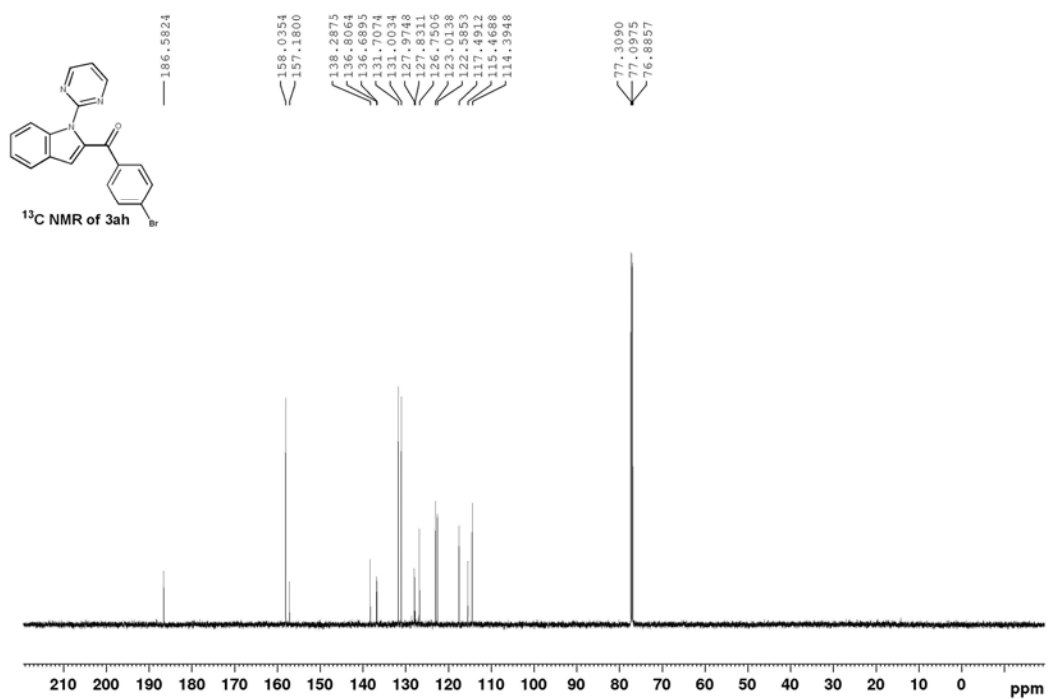

S19

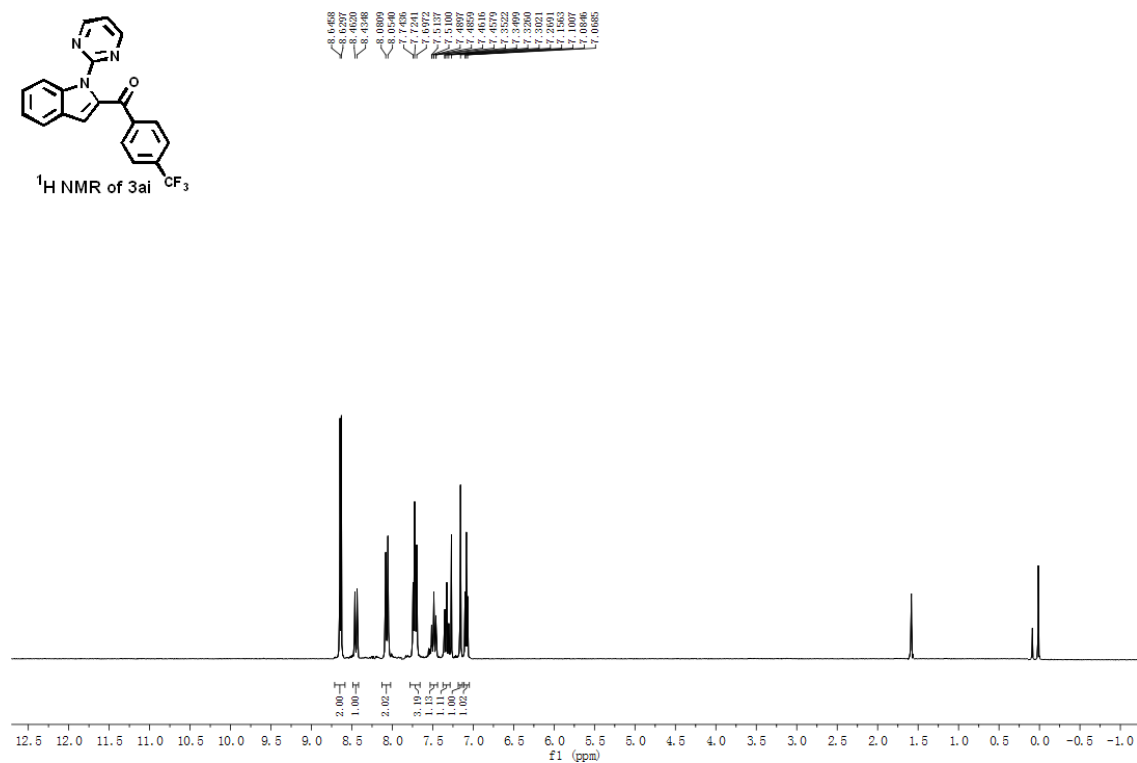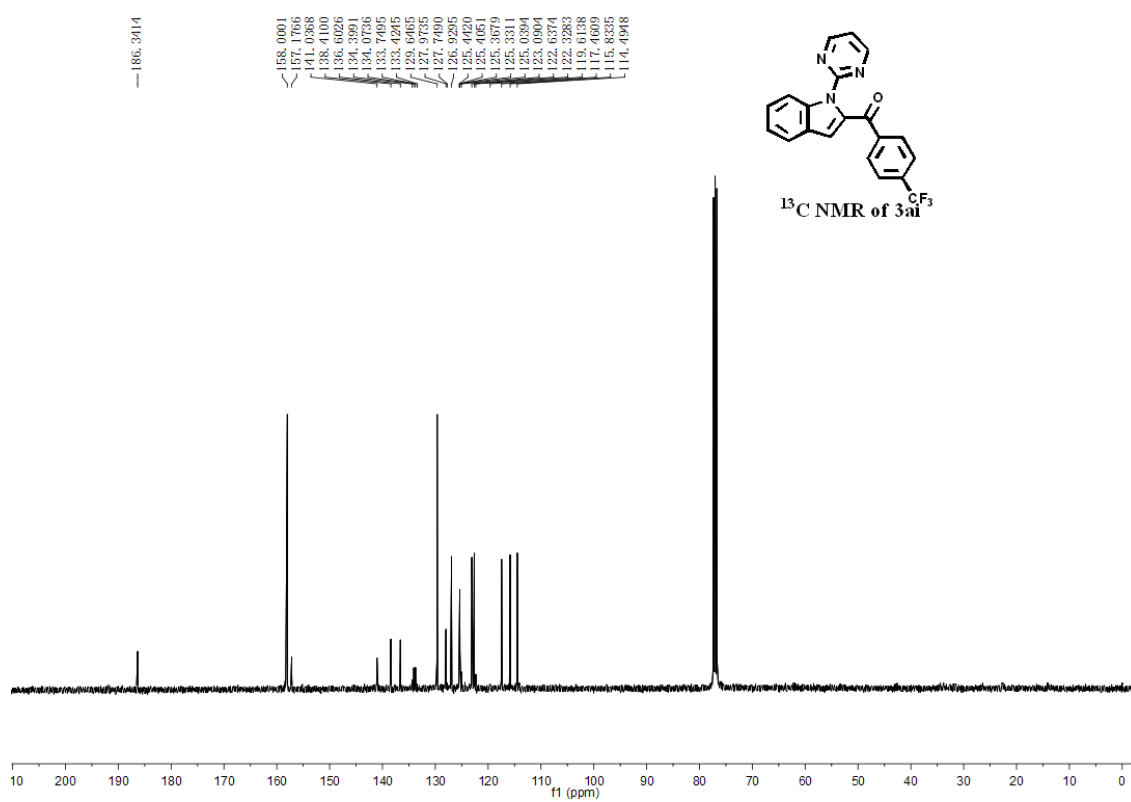

S20

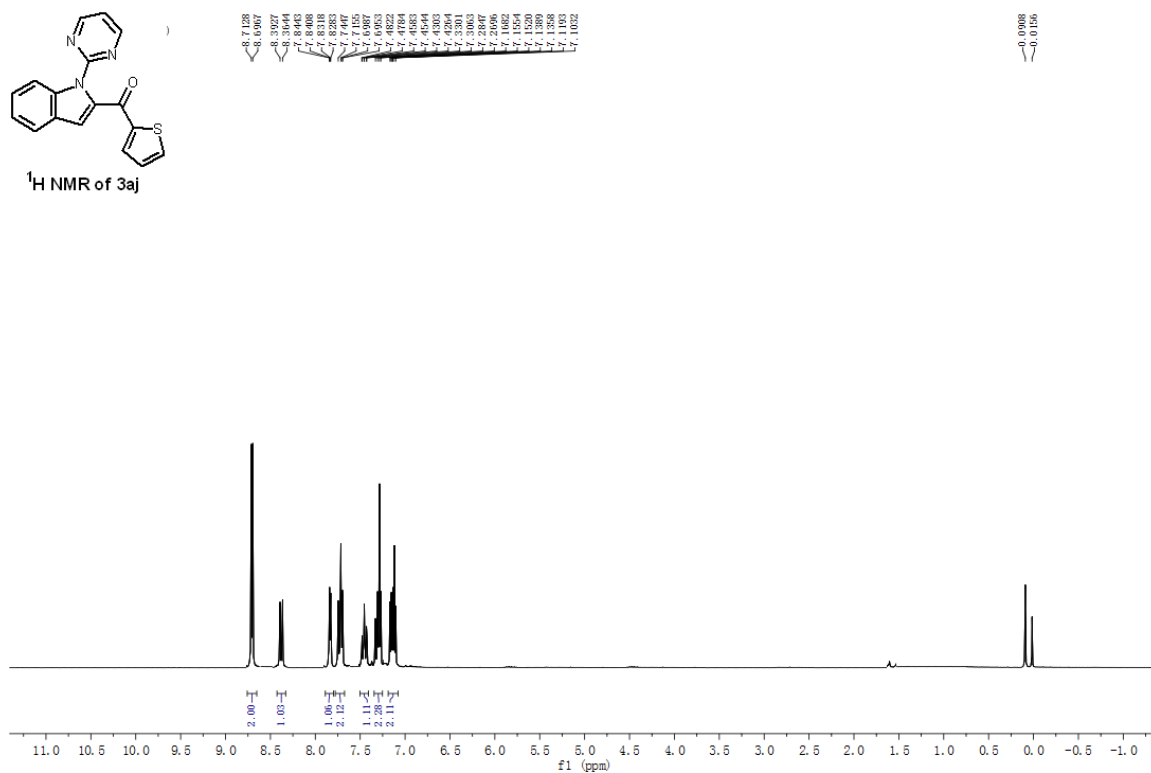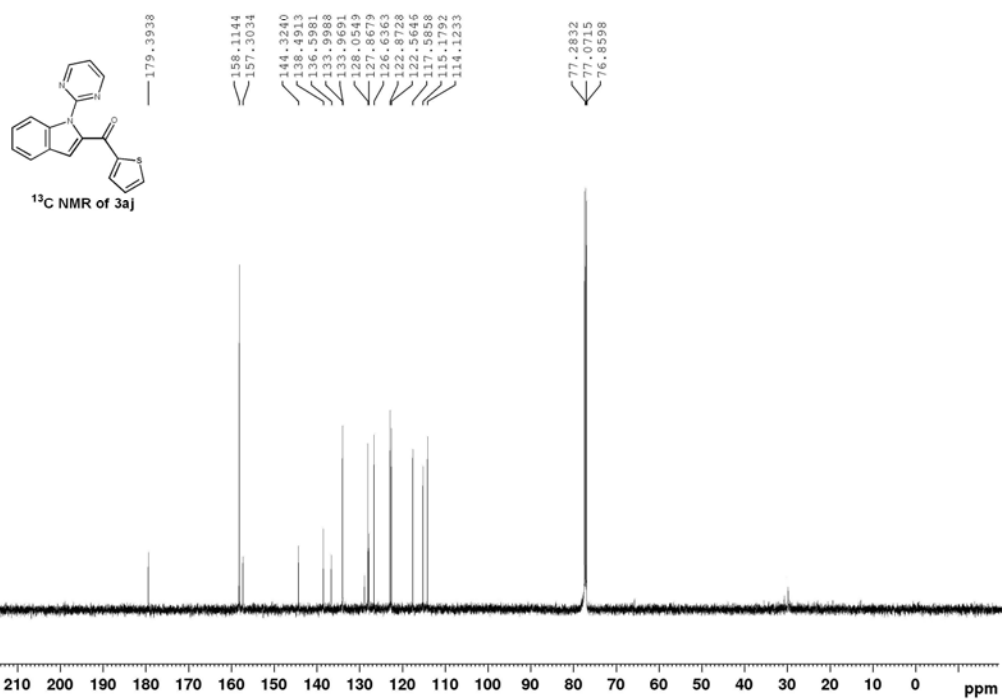

S21

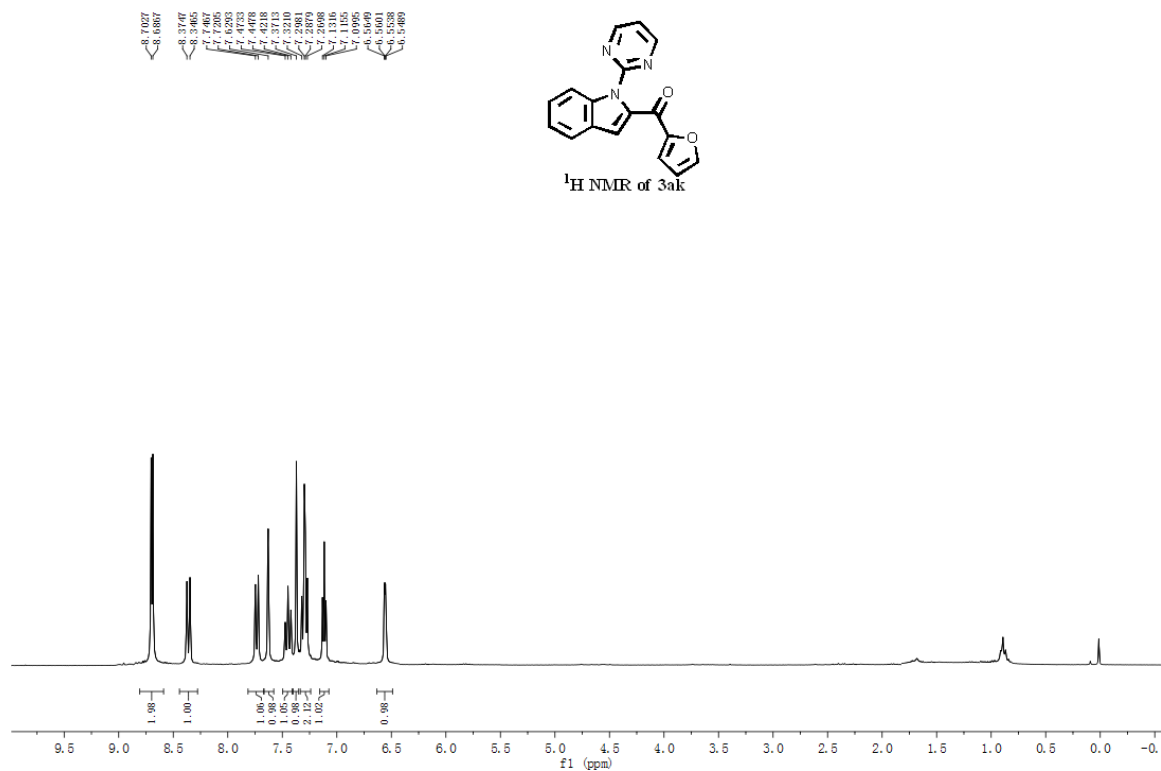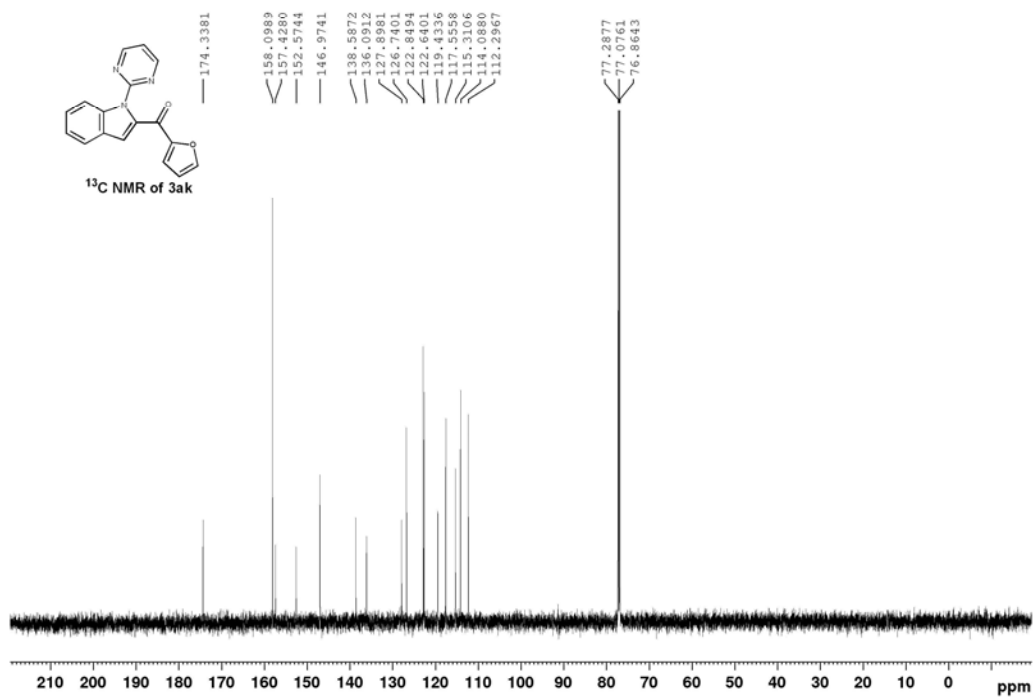

S22

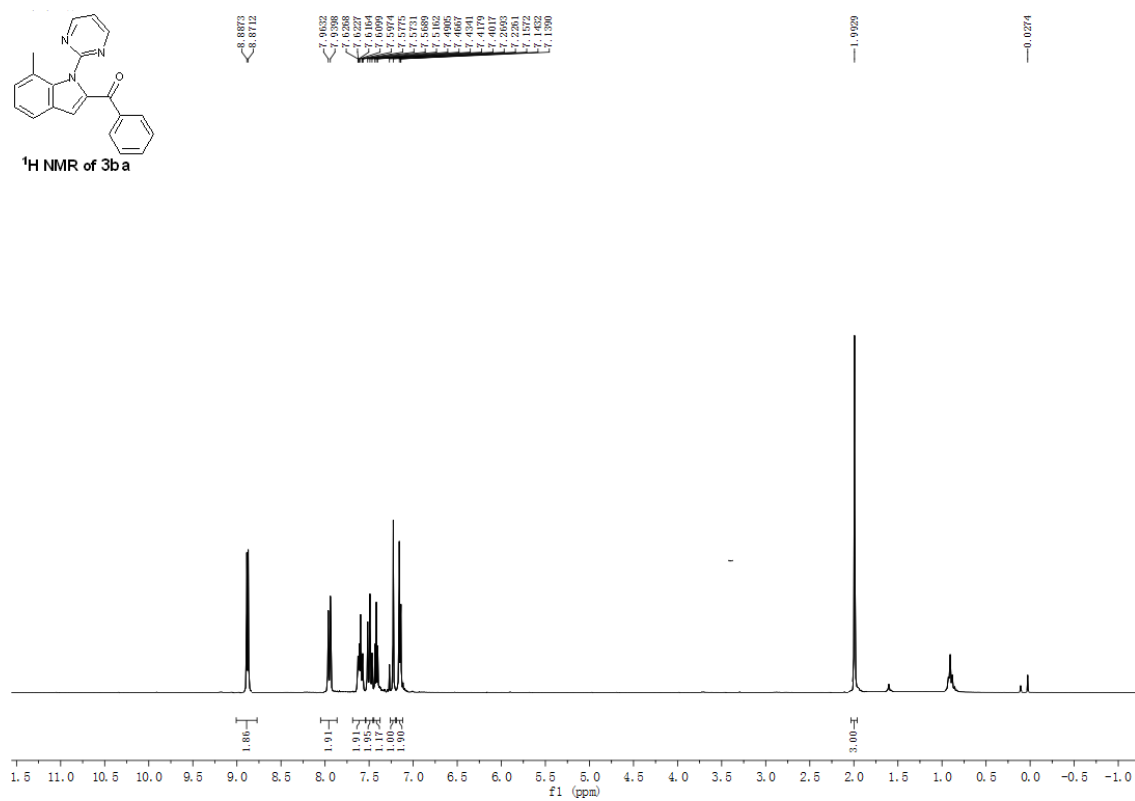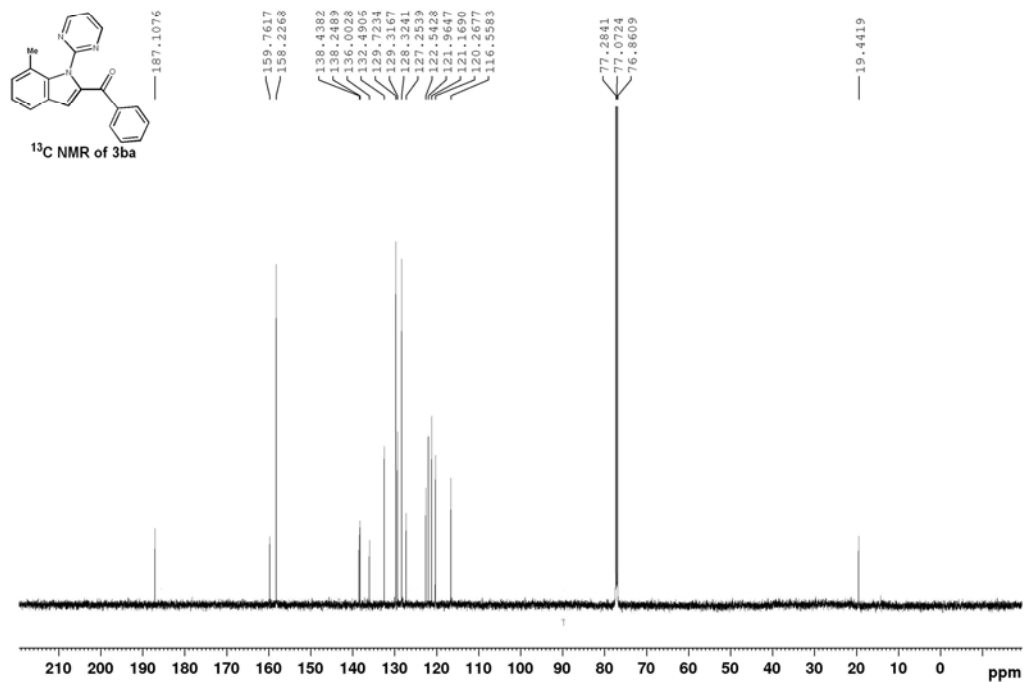

S23

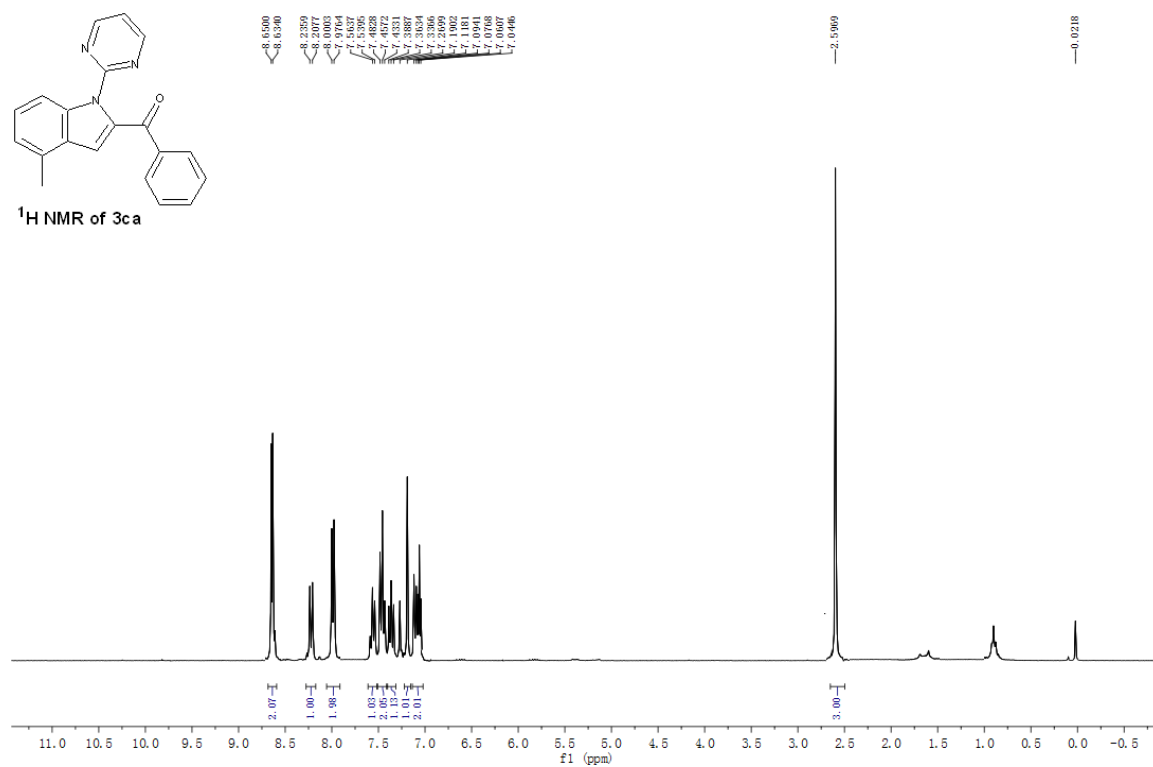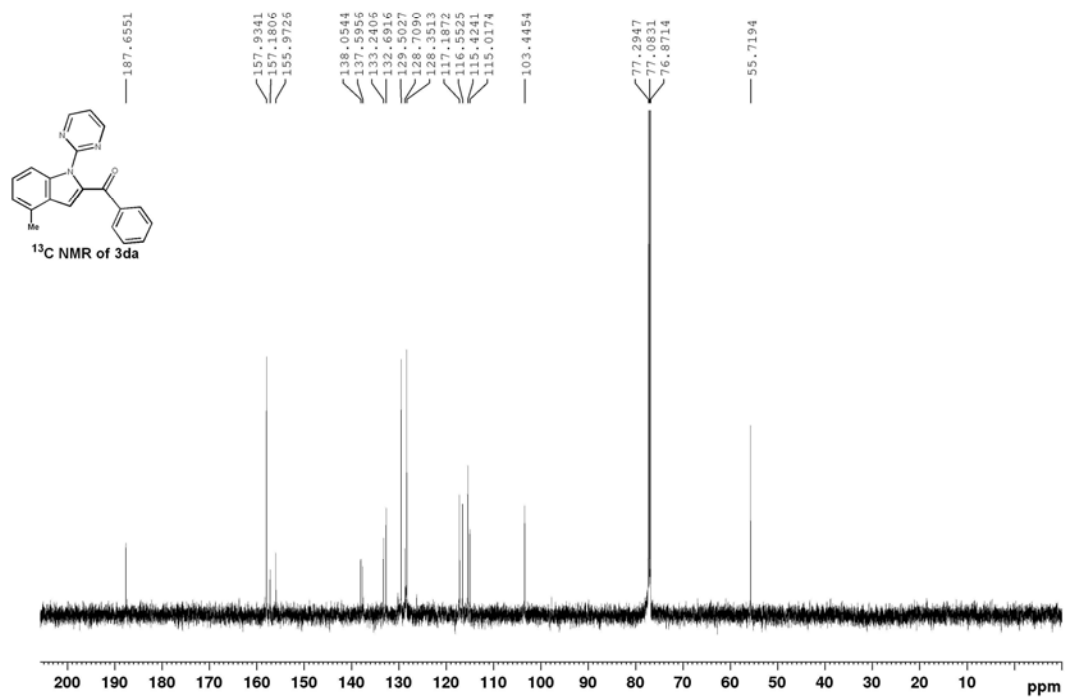

S24

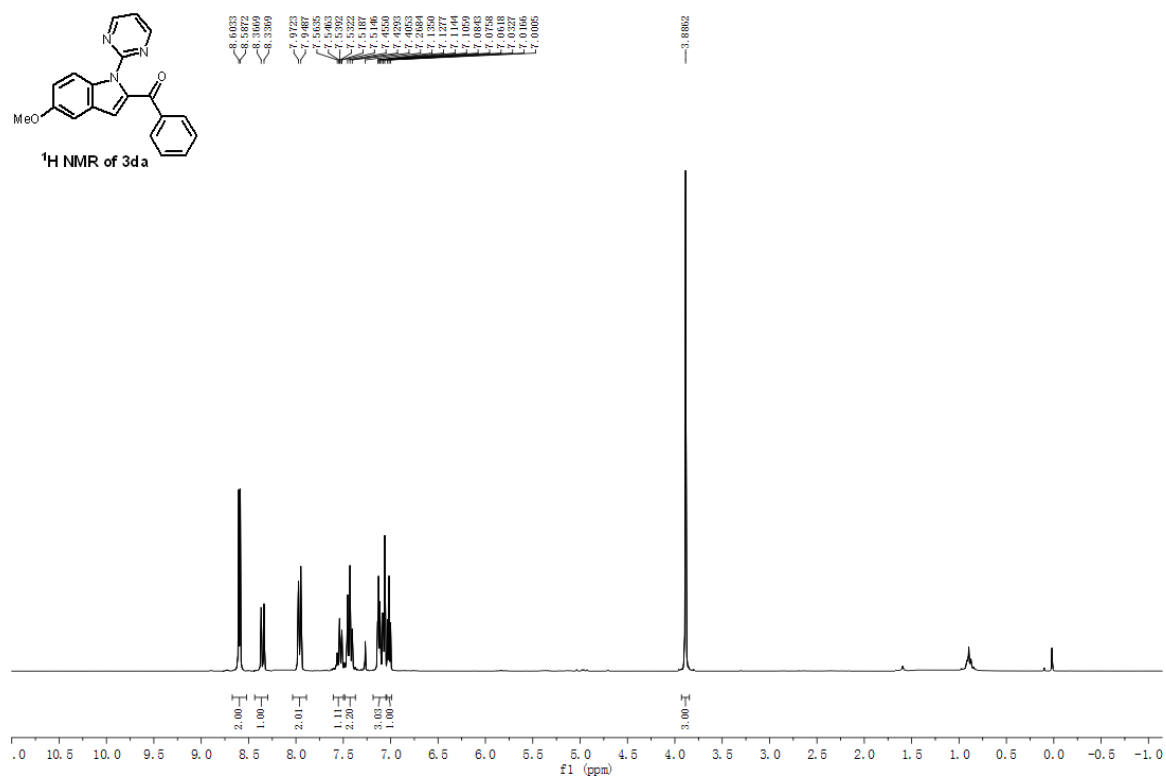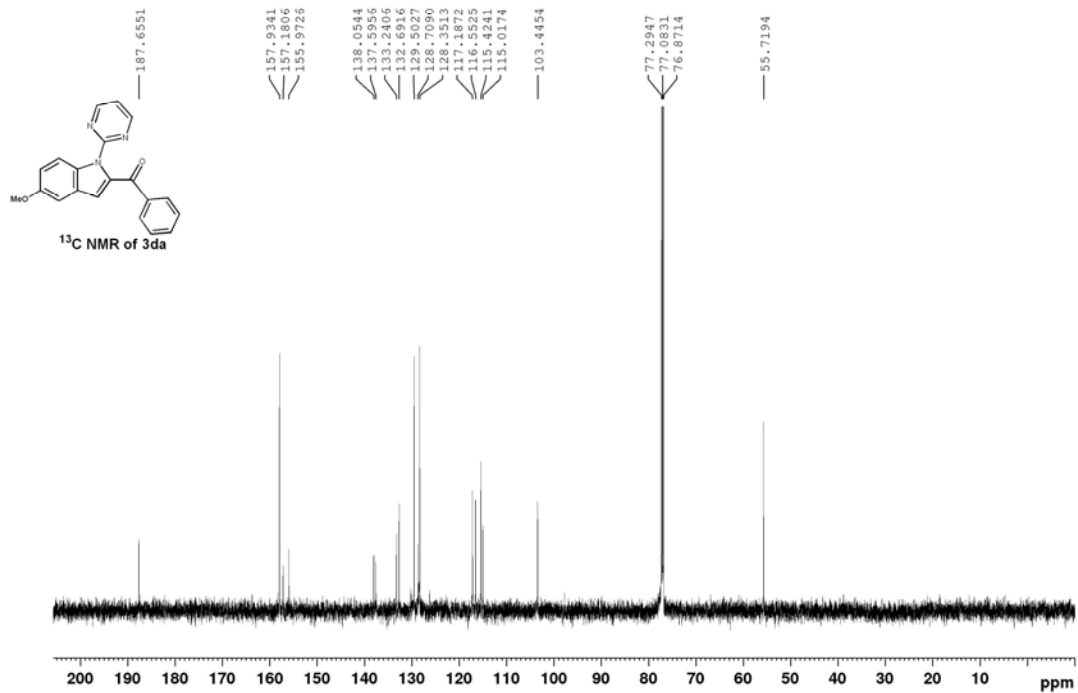



S25

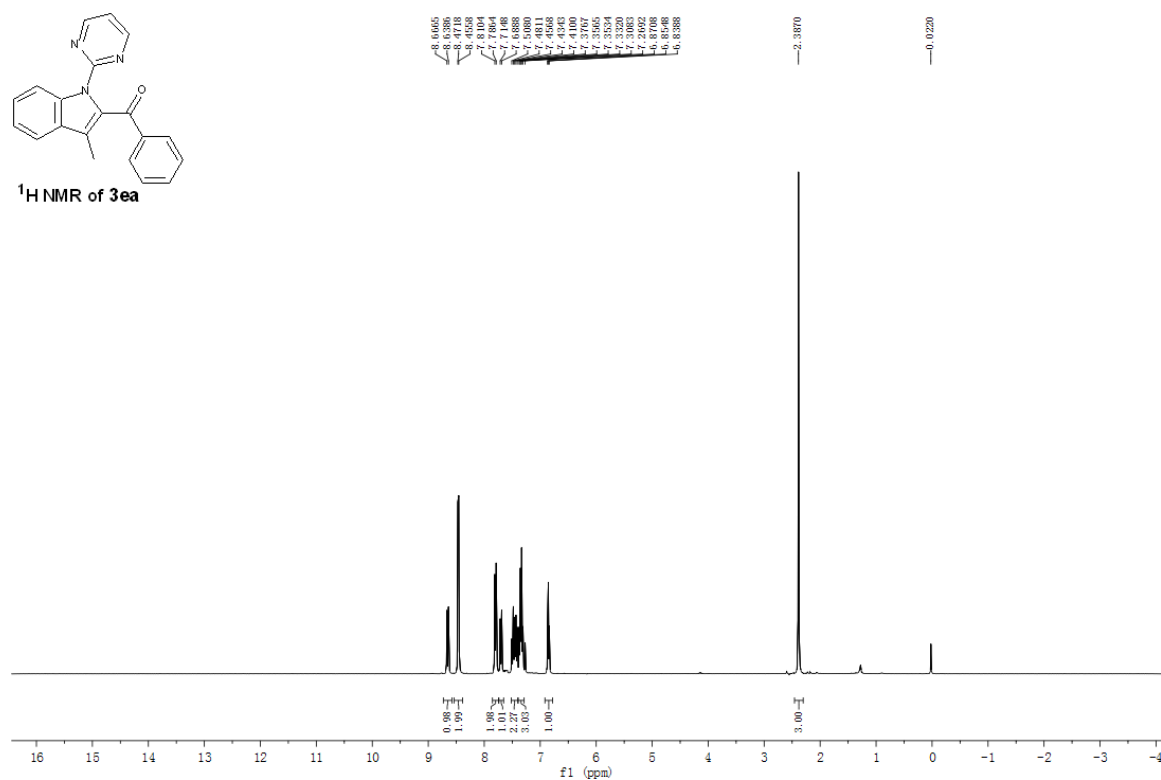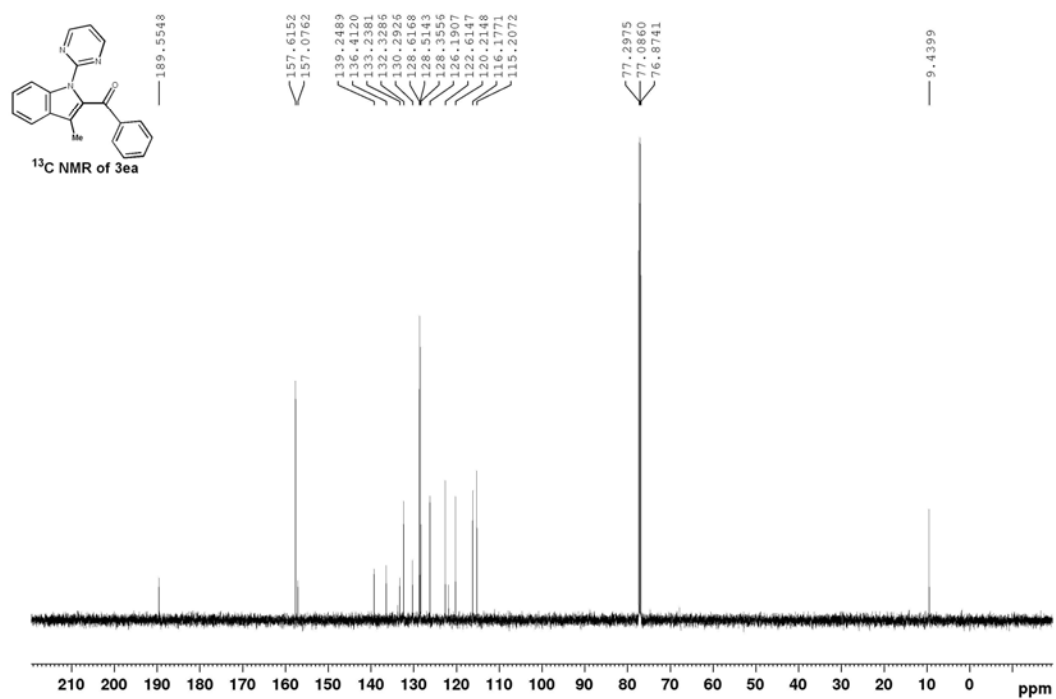

S26

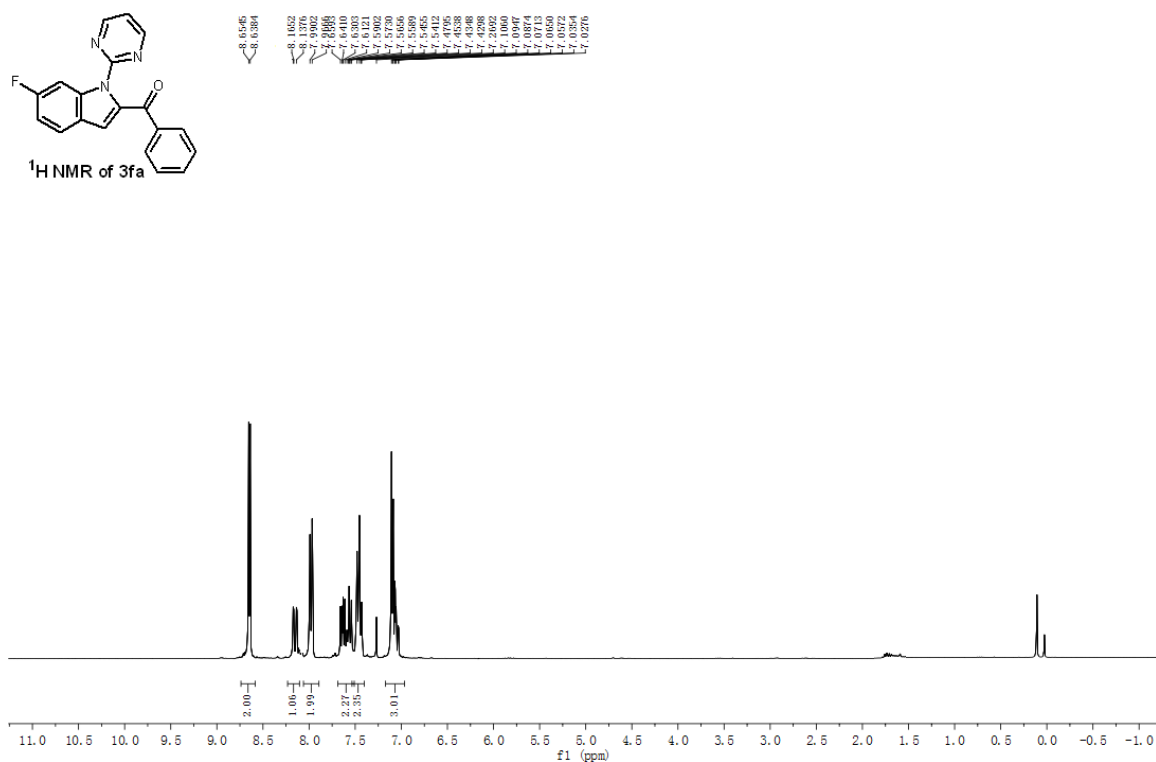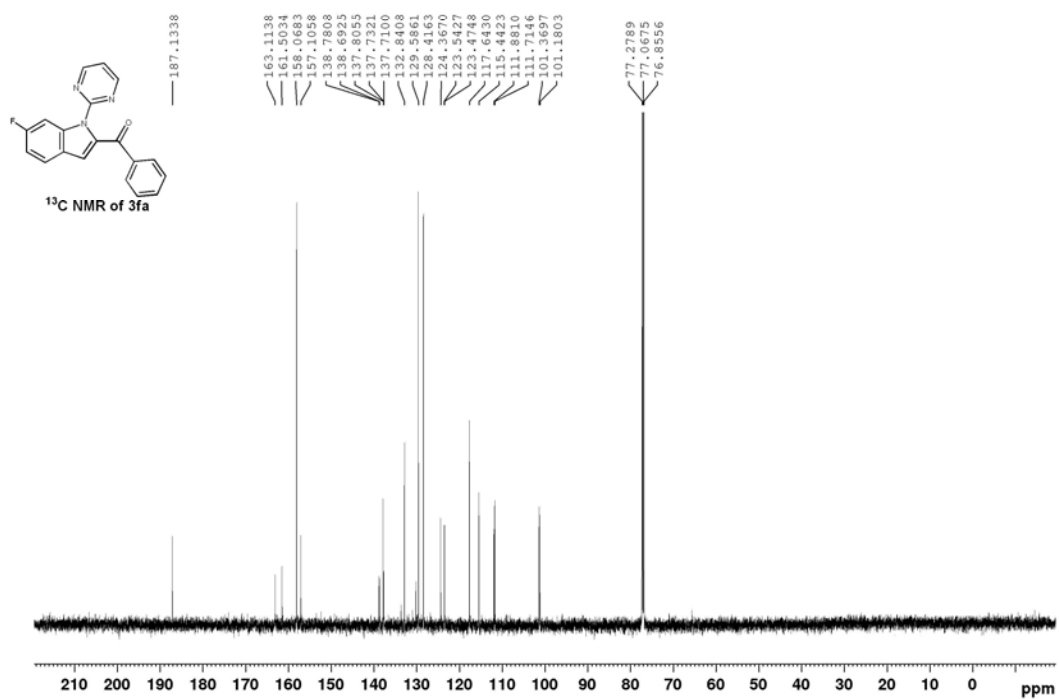

S27

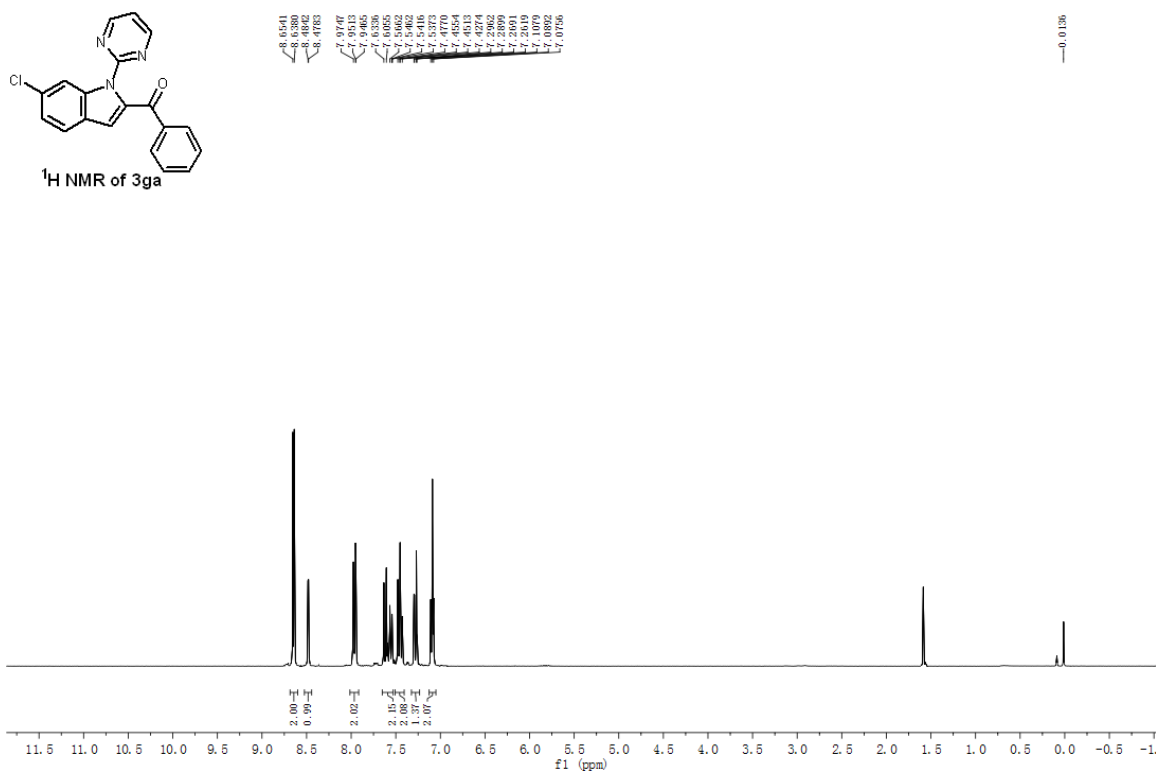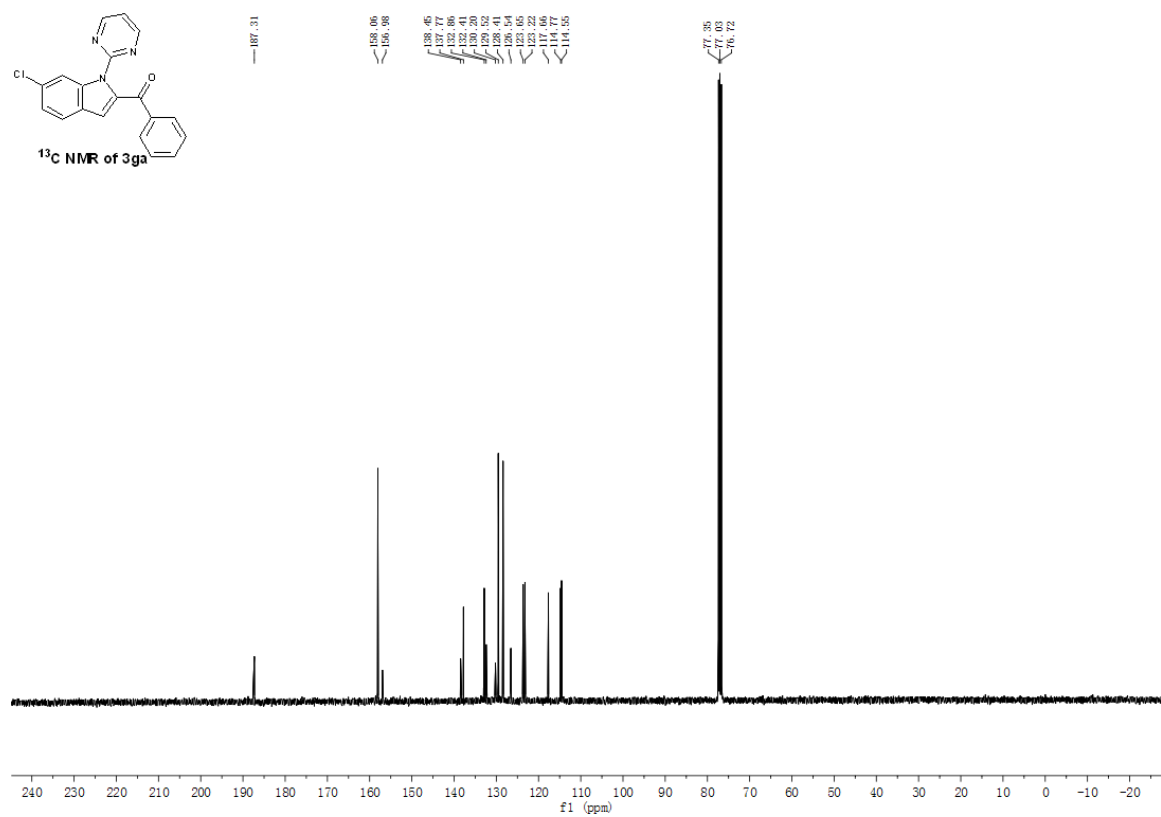

S28

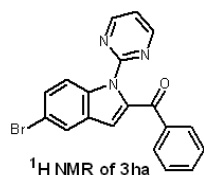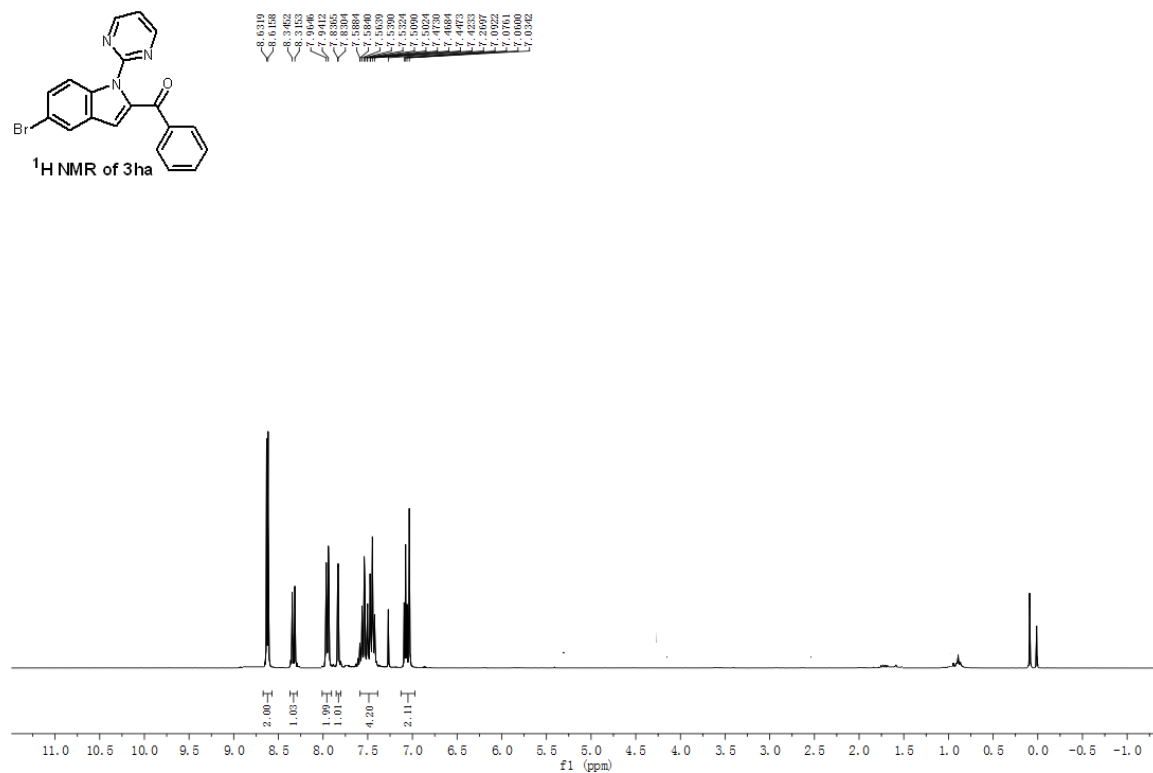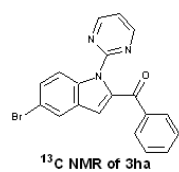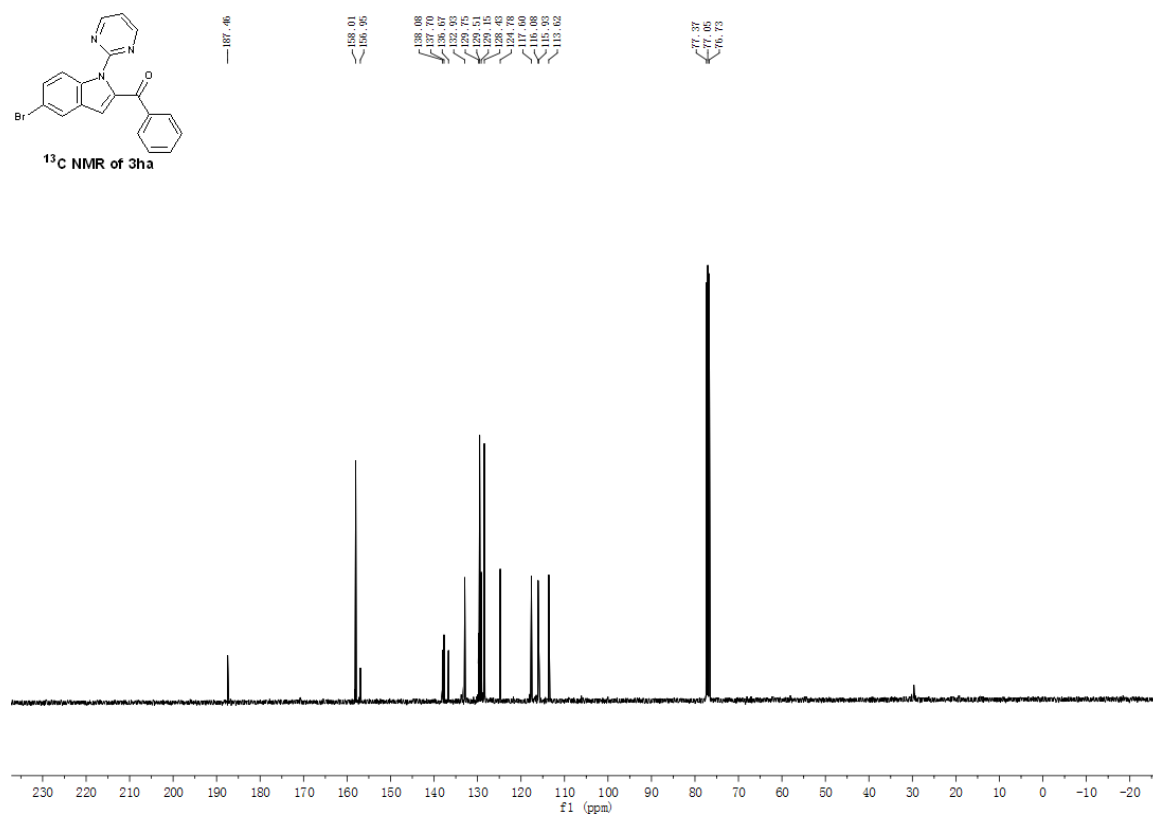

S29

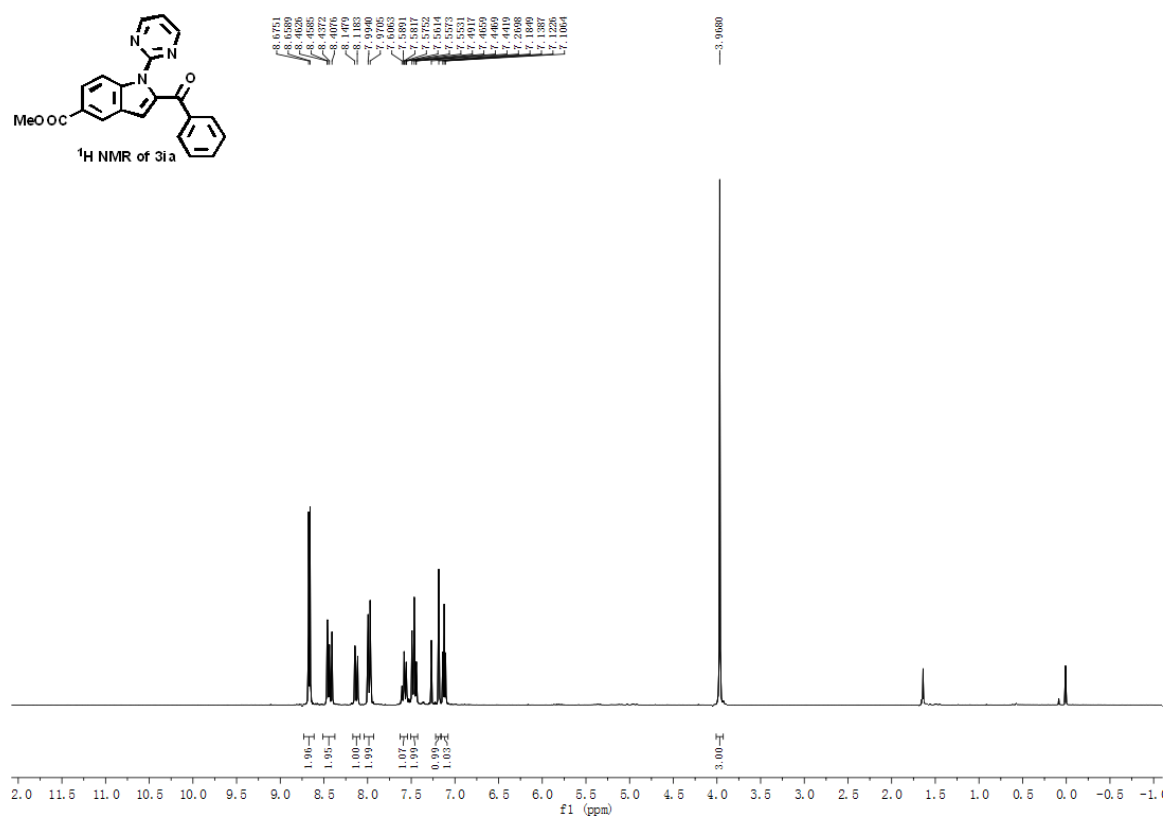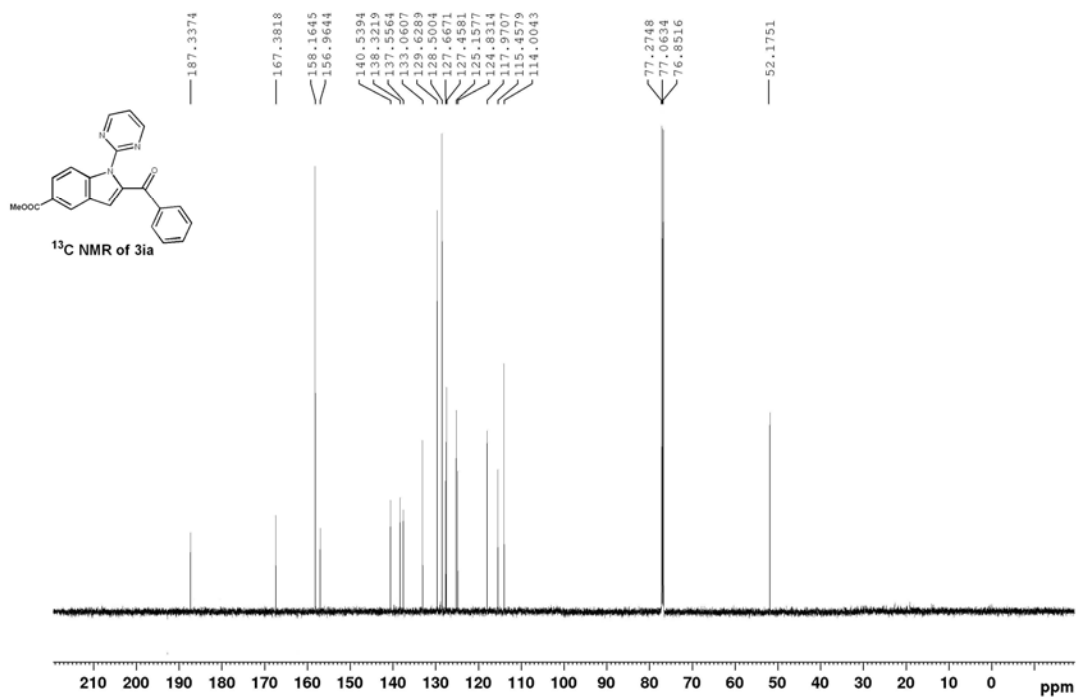

S30

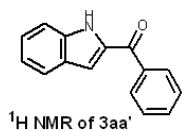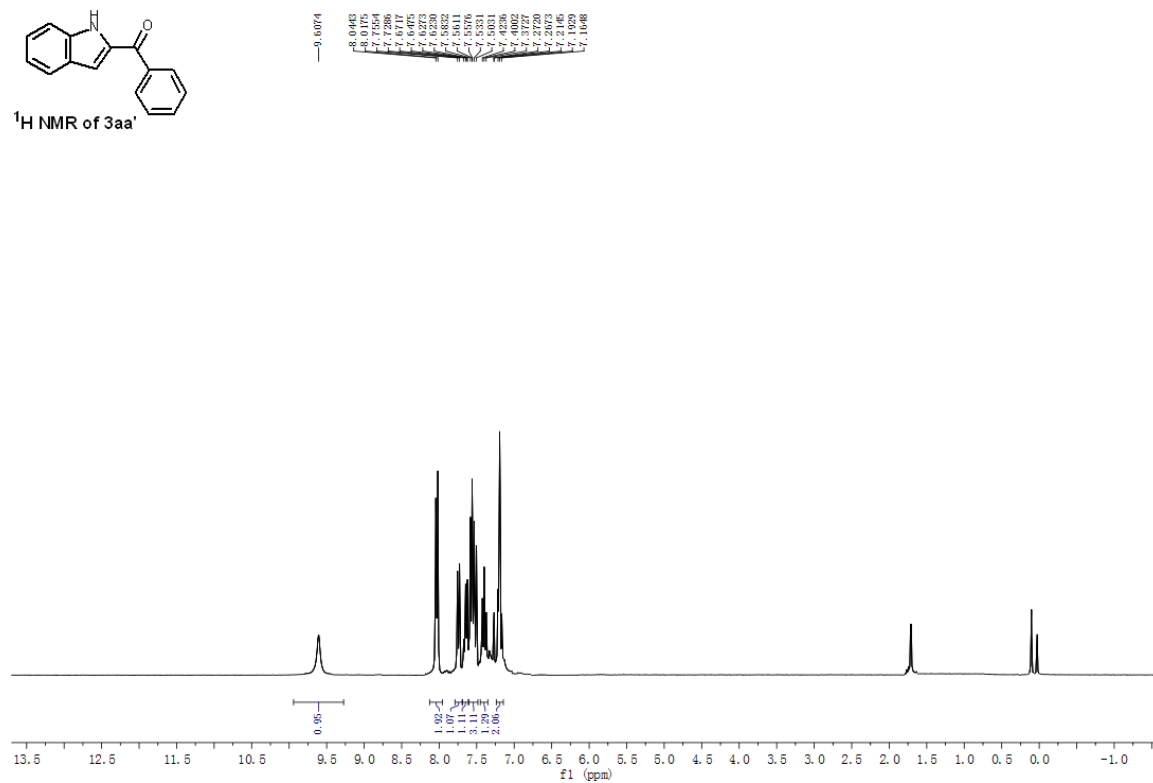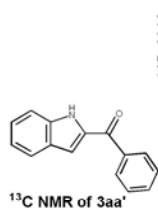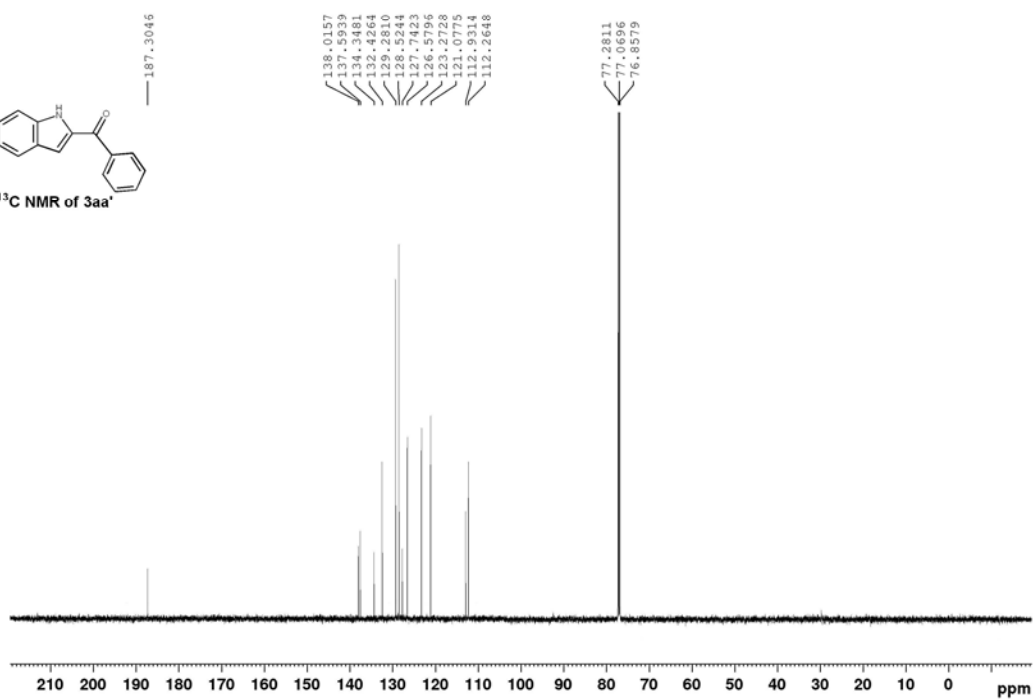

S31

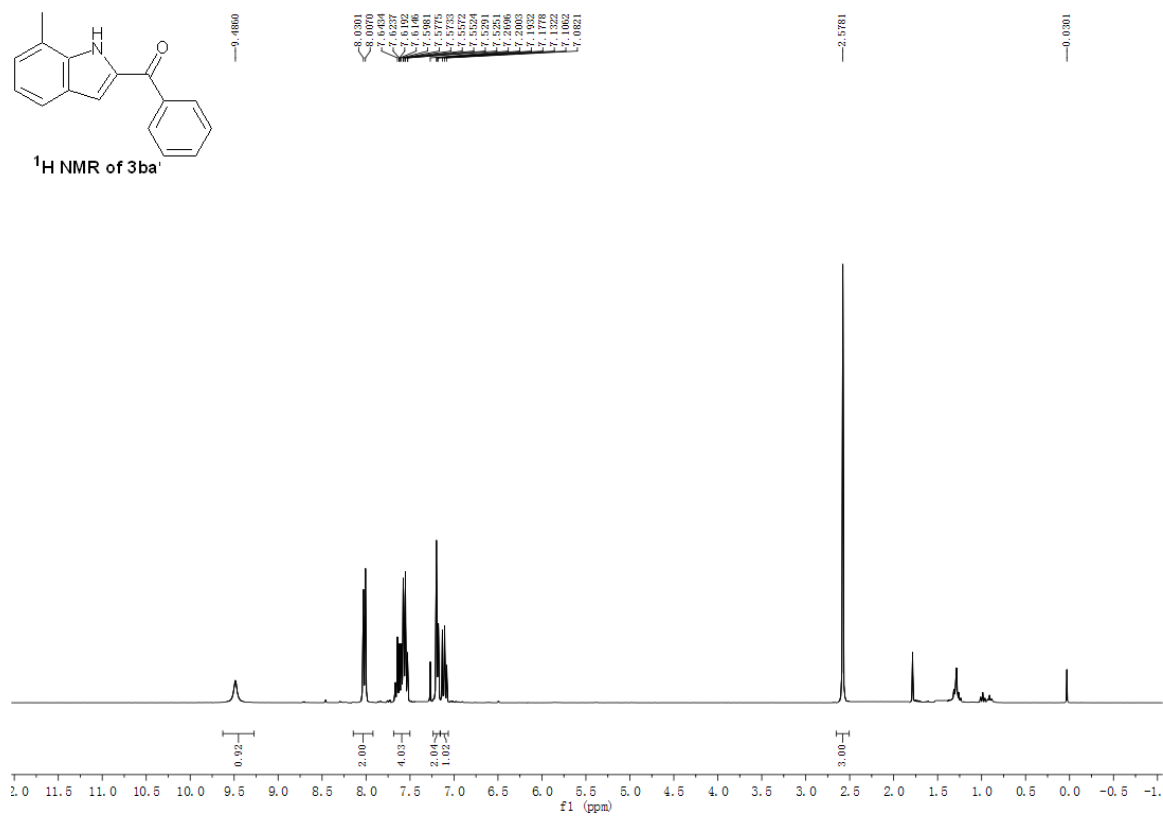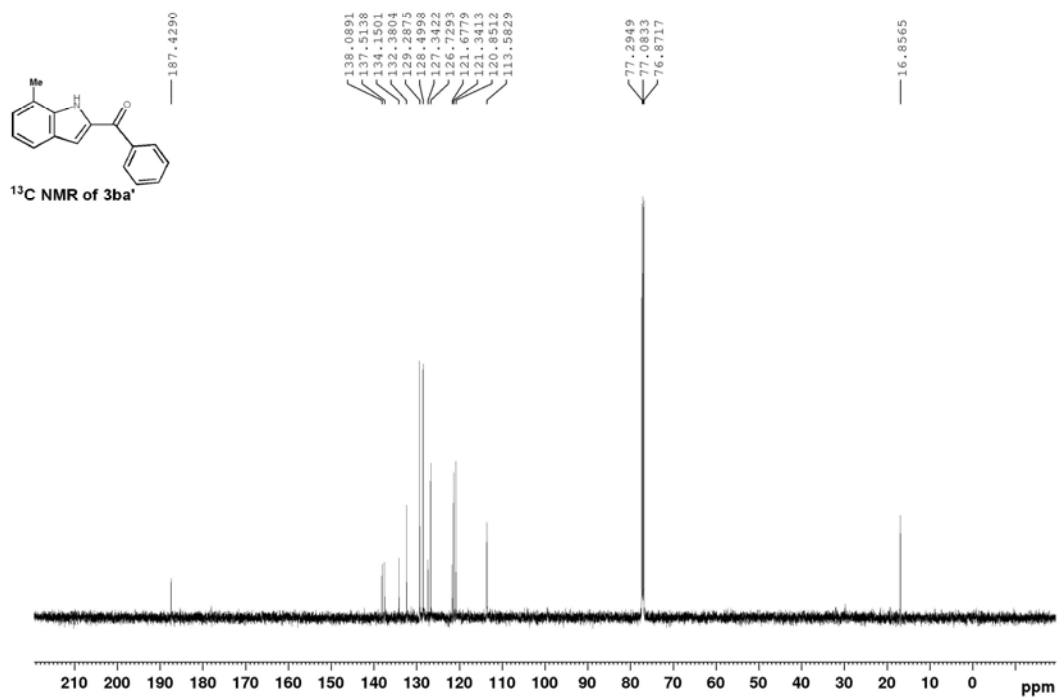

S32

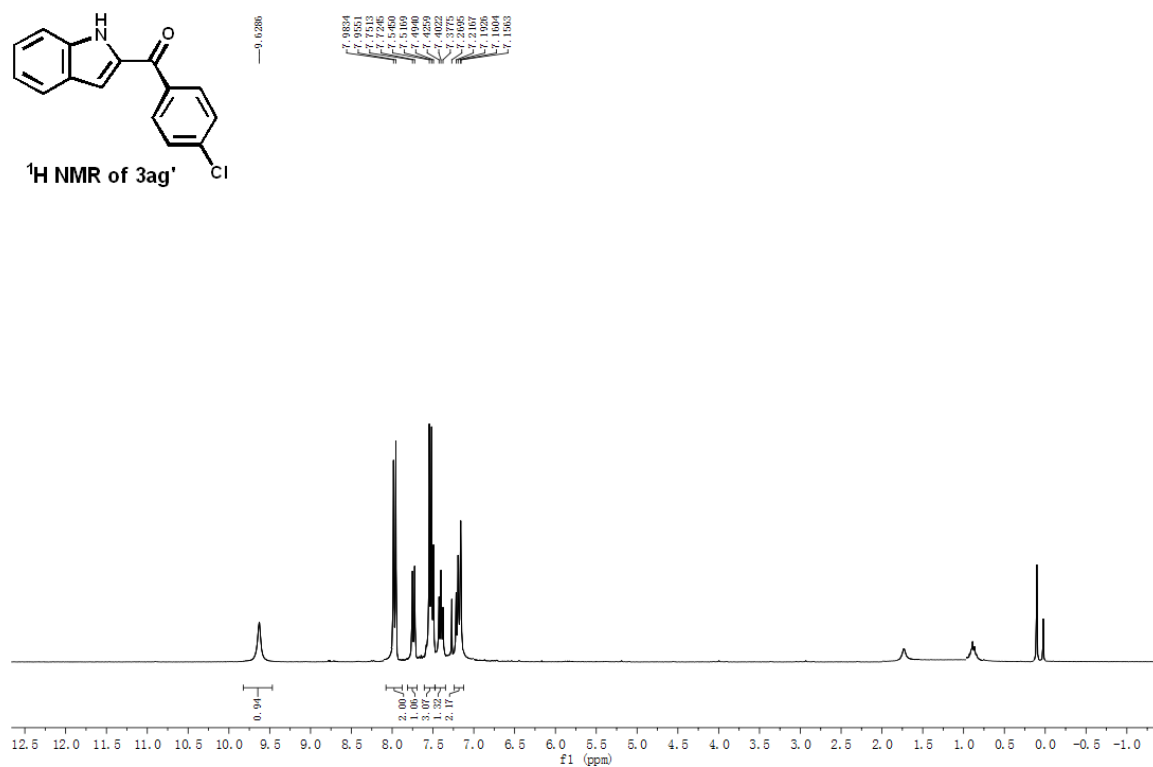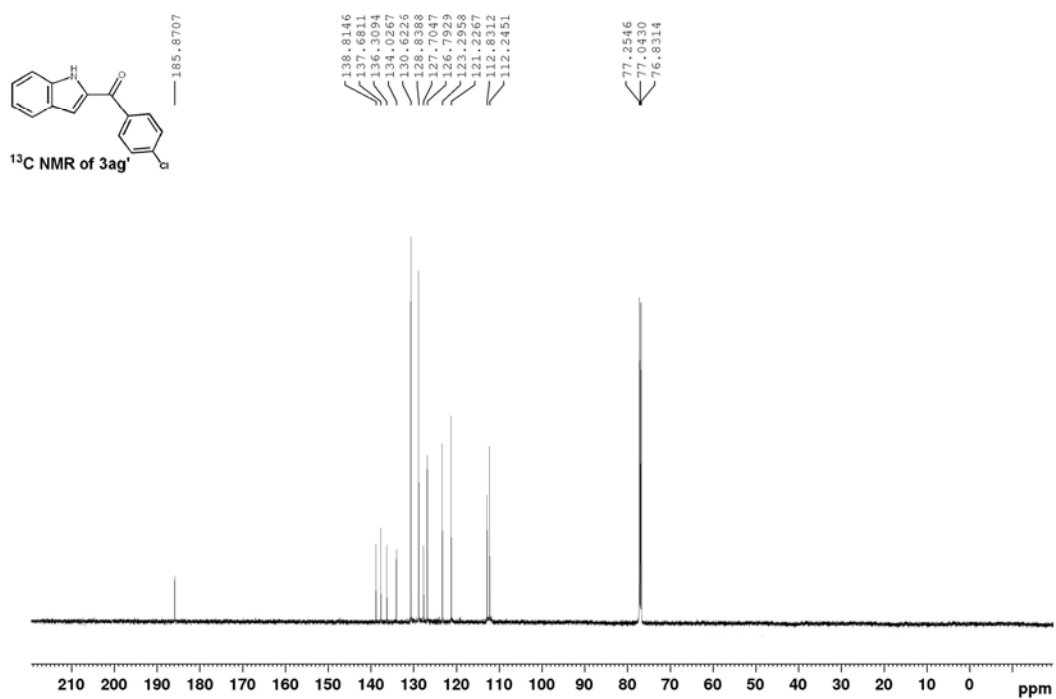

Supplement: c3cc40709h.pdf [file c3cc40709h.pdf]
